1 **Full title: Driving factors of conifer regeneration dynamics in eastern Canadian boreal old-**  
2 **growth forests**

3

4 **Short title: Conifer regeneration in boreal old-growth forests**

5

6 **Maxence Martin** <sup>1,2\*</sup>, **Miguel Montoro Girona**<sup>2,3,4</sup> and **Hubert Morin**<sup>1,2</sup>

7

8 <sup>1</sup> Département des Sciences fondamentales, Université du Québec à Chicoutimi, 555 boul. de

9 l'Université, Chicoutimi, QC G7H 2B1, Canada; [maxence.martin1@uqac.ca](mailto:maxence.martin1@uqac.ca) (M.M.);

10 [hubert\\_morin@uqac.ca](mailto:hubert_morin@uqac.ca) (H.M.)

11 <sup>2</sup> Centre d'étude de la forêt, Université du Québec à Montréal, P.O. Box 8888, Centre-ville

12 Station, Montréal (QC) H3C 3P8, Canada. 4

13 <sup>3</sup> Institut de Recherche sur les Forêts, Université du Québec en Abitibi-Témiscamingue,

14 Campus of Amos, 341 Rue Principal Nord, Amos, Québec J9T 2L8, Canada

15 <sup>4</sup> Restoration Ecology Group, Department of Wildlife, Fish, and Environmental Studies,

16 Swedish University of Agricultural Sciences (SLU), Umeå, 901 83, Sweden;

17 [miguel.montoro.girona@slu.se](mailto:miguel.montoro.girona@slu.se) (M.M.G.)

18

19 \*Correspondence: [maxence.martin1@uqac.ca](mailto:maxence.martin1@uqac.ca)

20 **Author Contributions:** Conceptualization: MM, MMG, HM. Fieldwork: MM, MMG. Data  
21 curation: MM. Investigation: MM. Methodology: MM. Data analyses: MM. Results interpretation:  
22 MM. Project administration: MM. Resources: HM. Supervision: HM, MMG. Visualization and  
23 edition: MM. Writing—original draft: MM, MMG, HM. Writing—review: MM. Funding: HM,  
24 MMG.

25 **Funding:** Funding was provided by the Natural Sciences and Engineering Research Council  
26 (NSERC) of Canada, the Canada Research Industrial Chairs Program obtained by HM, “Chaire de

27 recherche industrielle du CRSNG sur la croissance de l'épinette noire et l'influence de la tordeuse  
28 des bourgeons de l'épinette sur la variabilité des paysages en zone boréale," as well as a new  
29 professor start-up fund at University of Québec in Abitibi Temiscamingue (UQAT) and a  
30 silvicultural research grant from MRC-Abitibi that were both obtained by MMG.

31 **Conflicts of Interest:** The authors declare that the research was conducted in the absence of any  
32 commercial or financial relationships that could be construed as a potential conflict of interest.

33

## 34 **Abstract**

35 Old-growth forests play a major role in conserving biodiversity, protecting water resources,  
36 sequestering carbon, and these forests are indispensable resources for indigenous societies. To  
37 preserve the ecosystem services provided by these boreal ecosystems, it becomes necessary to  
38 develop novel silvicultural practices capable of emulating the natural dynamics and structural  
39 attributes of old-growth forests. The success of these forest management strategies depends on  
40 developing an accurate understanding of natural regeneration dynamics. Our goal was therefore  
41 to identify the main patterns and the drivers involved in the regeneration dynamics of old-growth  
42 forests, placing our focus on boreal stands dominated by black spruce (*Picea mariana* (L.) Mill.)  
43 and balsam fir (*Balsam fir* (L.) Mill.) in eastern Canada. We sampled 71 stands in a 2200 km<sup>2</sup>  
44 study area located within Quebec's boreal region. For each stand, we noted tree regeneration  
45 (seedlings and saplings), structural attributes (diameter distribution, deadwood volume, etc.), and  
46 abiotic (topography and soil) factors. We observed that secondary disturbance regimes and  
47 topographic constraints were the main drivers of balsam fir and black spruce regeneration.  
48 Furthermore, the regeneration dynamics of black spruce appeared more complex than those of  
49 balsam fir. We observed distinct phases of seedling production first developing within the  
50 understory, then seedling growth when gaps opened in the canopy, followed by progressive  
51 canopy closure. Seedling density, rather than the sapling density, had a major role in explaining  
52 the ability of black spruce to fill the canopy following a secondary disturbance. The density of  
53 balsam fir seedlings and saplings was also linked to the abundance of balsam fir trees at the stand  
54 level. This research helps explain the complexity of old-growth forest dynamics where many  
55 ecological factors interact at multiple temporal and spatial scales. This study also improves our

56 understanding of ecological processes within native old-growth forests and identifies the key  
57 factors to consider when ensuring the sustainable management of old-growth boreal stands.

58  
59 **Keywords:** black spruce, forest ecology, fire, habitat, natural disturbances, population dynamic,  
60 seedlings, spruce budworm, succession, sustainable forest management, uneven-aged stands,  
61 restoration.

## 62 **Introduction**

63 The global extent of native old-growth forest has declined markedly over the past few centuries  
64 through a cumulative and increasing impact from anthropic activities within these forest  
65 landscapes (1–3). The boreal forest, most of which is situated in Canada and Russia, is currently  
66 the largest reserve of natural forest on our planet (3). Boreal old-growth forest has also  
67 experienced rapid loss over the last centuries (1,4,5). The remaining old-growth forests are  
68 critically important to biodiversity, water resources, carbon sequestration and storage, and these  
69 stands remain integral elements of indigenous societies and even human health (3,6). The  
70 sustainable management of boreal forests has a primary goal of protecting the remaining old-  
71 growth forests. Restoring the integrity of intact forests is also an urgent issue; this is especially  
72 true in Fennoscandia where old-growth forests have been almost completely eliminated (7). We  
73 are therefore facing a critical situation where novel silvicultural practices and restoration  
74 strategies are now priorities in the context of the global biodiversity crisis, climate change, and  
75 forest sustainability.

76 Effective forest restoration strategies require an accurate understanding of the natural dynamics  
77 of old-growth forests. Tree regeneration is an essential process in forest ecosystems to ensure the  
78 persistence and resilience of forest stands when subjected to various disturbances (8,9). As such,

79 forest science is placing increased importance on understanding tree regeneration following  
80 natural and anthropic disturbance (e.g., 10–16). However, regeneration dynamics in old-growth  
81 forests remain an understudied subject in ecology; this absence is particularly true for the boreal  
82 biome. Moreover, due to the scarcity of old-growth stands in many boreal regions, conducting  
83 studies related to this subject is often challenging, given the lack of reference sites. This need for  
84 baseline data underscores the important scientific value of the boreal biome in eastern Canada  
85 where some regions still contain large intact stands of forest as intensive forest management  
86 practices only began relatively recently, i.e., since the 1960s (17,18). The study of regeneration  
87 dynamics in the boreal old-growth forests of eastern Canada thus represents a benefit for all  
88 boreal regions, especially those where these ecosystems have been almost completely eliminated.  
89 Black spruce (*Picea mariana* (L.) Mill.) and balsam fir (*Abies balsamea* (L.) Mill.) are the two  
90 main late-successional species in the eastern Canadian boreal forest (19). Pure black spruce or  
91 mixed black spruce–balsam fir stands are the most common old-growth forest types in eastern  
92 Canada (19–21). Old-growth forests are also, however, the most logged forest type in this  
93 territory, leading to the rapid loss of old-growth forest surfaces (5,22,23). Pure black spruce  
94 stands are under even greater pressure as this specific old-growth forest type is most selected for  
95 logging given the high economic value of this species (23).

96 Both black spruce and balsam fir are well adapted to long (>150 years) periods of suppressed  
97 growth in the understory (24–26). These species are also able to regenerate under their own  
98 cover, mostly through vegetative reproduction for black spruce—regeneration by layers—and  
99 sexual reproduction, i.e., seed origin, for balsam fir (19). Previous studies have highlighted that  
100 the seedling densities of black spruce and balsam fir are similar under gaps or canopy cover (27–  
101 29). When a gap in the canopy opens as a result of a secondary disturbance, the gap-fillers will  
102 therefore generally be pre-established regeneration rather than seeds or layers that would have

103 established following the disturbance (30,31). Once a gap is created, the regeneration trees of  
104 both species increase their vertical growth to reach the overstory relatively quickly (26,32,33).  
105 However, black spruce and balsam fir differ in their ecological strategies in terms of growth,  
106 sensitivity to disturbance, resistance to fire, and seed dispersal; as such, these differences should  
107 vary their specific regeneration dynamics. Balsam fir regeneration is seen as being more  
108 competitive than that of black spruce due to balsam fir seedlings' faster and more intense growth  
109 response to canopy openings (31,34). Balsam fir, however, is more vulnerable to spruce  
110 budworm (*Choristoneura fumiferana* (Mills.)) outbreaks, windthrow, and root rot than black  
111 spruce (35–38). Moreover, balsam fir seeds are not adapted to fire, making this species strongly  
112 dependent on the proximity of seed trees, as opposed to black spruce that is very well adapted to  
113 fire events (39). Black spruce also outcompetes balsam fir on wet soils (39).

114 From the abovementioned observations, stands in the old-growth forests in eastern Canada are  
115 expected to shift between black spruce–dominated stands and black spruce–balsam fir mixed  
116 stands over time (21,28,40). As well, the structure of these stands varies over time (decades and  
117 centuries), even though tree species' composition remains the same (40,41). At a decennial scale,  
118 it is therefore likely that the characteristics of the understory, e.g., tree density or tree species  
119 composition within the regeneration layer, will change significantly and rapidly due to the  
120 succession of tree-mortality and canopy closure phases.

121 Understanding the regeneration process in old-growth forests is therefore critical for developing  
122 management strategies and silviculture treatments that limit differences between managed and  
123 unmanaged forests (42). Our study objective is to identify the main patterns and factors involved  
124 in the regeneration dynamics of black spruce and balsam fir in the eastern Canadian boreal old-  
125 growth forests. We hypothesize that (1) for both black spruce and balsam fir, sapling density will  
126 increase in relation to the secondary disturbance–related structural changes, such as an opening of

127 the canopy and an increase in deadwood volume, and (2) the main differences between black  
128 spruce and balsam fir regeneration dynamics are due to abiotic constraints and the availability of  
129 proximal balsam fir seed trees.

## 130 **Materials and methods**

### 131 **Study area**

132  
133 Our study involved a 2200 km<sup>2</sup> region of public forest southeast of Lake Mistassini, Québec,  
134 Canada, (**Fig 1**) within an area extending between 50°07'23"N to 50°30'00"N and 72°15'00"W to  
135 72°30'00"W. The study zone is crossed by the Mistassini, Ouasiemsca, and Nestaocano rivers  
136 and lies within the western subdomain of the black spruce–feather moss bioclimatic domain (43).  
137 Regional climate is subarctic with a short growing season (120–155 days). Mean annual  
138 temperature ranges between –2.5 and 0.0 °C, and mean annual precipitation is 700 to 1000 mm  
139 (43). Surficial deposits consist mainly of thick glacial tills, forming a low-lying topography  
140 characterized by gentle hills that vary in altitude from 350 to 750 m asl (44). Black spruce and  
141 balsam fir dominate the stands across this territory, while jack pine (*Pinus banksiana* Lamb.),  
142 white spruce (*Picea glauca* (Moench) Voss), paper birch (*Betula papyrifera* Marsh.), and  
143 trembling aspen (*Populus tremuloides* Michx.) are the secondary tree species.  
144 Fire is the main driver of stand-replacing disturbances on this territory (45), while spruce  
145 budworm outbreaks are the principal agent of secondary disturbance (26). This territory was  
146 unmanaged until 1991 when intensive timber exploitation began. The surface area harvested  
147 remained relatively low until 2000; however, harvesting increased significantly after this date.

148  
149 **Fig 1.** Map of the study territory showing the location of the sample sites (red filled circles). The  
150 insert map indicates the location of the study territory in Quebec, Canada (red circle).

151

## 152 **Experimental design**

153  
154 We sampled 71 stands in the study area during 2015 and 2016 and applied a stratified random  
155 sampling approach. Site selection considered two main criteria: 1) that sites reflected the six  
156 dominant environmental types found within the study area, according to the ecological  
157 classification of the Quebec Ministry of Forests, Wildlife and Parks (MFWP) (43), and 2) that sites  
158 must contain two minimal stand-age classes (80–200 years and >200 years). Environmental types  
159 are defined through a combination of site potential vegetation, slope classes, surface deposits, and  
160 drainage classes. The six dominant MFWP environmental types covered more than 72% of the  
161 productive forest. They included: 1) balsam fir–white birch potential vegetation having moderate  
162 slopes, till deposits, and mesic drainage; 2) black spruce–balsam fir potential vegetation having  
163 moderate slopes, till deposits, and mesic drainage; 3) black spruce–feather moss potential  
164 vegetation (BSFM) having gentle slopes, sand deposits, and xeric drainage; 4) BSFM having gentle  
165 slopes, till deposits, and mesic drainage; 5) BSFM having gentle slopes, till deposits, and subhydric  
166 drainage; and 6) BSFM having gentle slopes, organic deposits, and hydric drainage.

167 The age classes correspond to the successional stages of the transition process toward the old-  
168 growth stage in Quebec boreal forests (20,46,47): 80–200 years (beginning of the transition toward  
169 an old-growth forest) and >200 years (end of the transition to an old-growth forest). Stand age was  
170 assessed by surveys in 2015 and 2016, during which we collected cores from the root collar of five  
171 dominant or codominant trees per site. Tree age was determined from tree-ring counts of these  
172 cores using a binocular microscope.

173 As the study area is very remote and has limited road access, we added additional logistical  
174 criteria to the site selection process; we therefore sampled only sites that were accessible via the



175 existing road network. As well, our surveys were systematically placed at 125 m from the stand  
176 edge to limit the influence of the edge effect.

177

## 178 **Plot measurements**

179 At each site, we established a permanent square plot (400 m<sup>2</sup>) as the basis for all subsequent  
180 transects and subplots (**Fig 2**). We sampled all merchantable trees—trees having a diameter at  
181 breast height (DBH)  $\geq 9$  cm—in each 400-m<sup>2</sup> plot. The attributes sampled were species, DBH and  
182 vitality (alive or dead). We then surveyed all saplings—stems having a DBH  $< 9$  cm and height  
183  $\geq 1.3$  m—within two 100-m<sup>2</sup> (10 m  $\times$  10 m) subplots within the larger plot (**Fig 2**). The attributes  
184 sampled for saplings were species and DBH. To count seedlings and quantify their attributes, we  
185 established twenty-five 4-m<sup>2</sup> circular plots along five 25-m-long transects (5 circular  
186 plots/transect) that extended out from the center of the 400-m<sup>2</sup> plot. The angle between two  
187 neighboring 25 m-long transects was equal to 72°. Transect 1 was the transect oriented due north.  
188 Along a transect, the first circular plot was placed 5 m from the center of the 400-m<sup>2</sup> plot, with  
189 the following circular plots separated by 5 m. In each 4m<sup>2</sup> plot, we inventoried all seedlings by  
190 tree species. We also measured gap length along the five 25 m-long seedling transects. We  
191 defined the size of our study from other similar studies and the forest survey methods of the  
192 Quebec provincial government (15,48).

193

194 **Fig 2.** Schematic representation of the experimental design used for the sample sites. N: north;  
195 CWD: coarse woody debris.

196

197 In addition to these sapling transects, we surveyed coarse woody debris along four 20 m-long  
198 transects that followed the edges of the 400-m<sup>2</sup> plot. We surveyed the diameter of any coarse  
199 woody debris intersecting with the transect. We recorded this information for only debris having

200 a diameter >9 cm at the transect intersection. Debris items buried in the organic layer at a depth  
201 >15 cm were not sampled. We determined the soil and topographic parameters by digging a soil  
202 profile at the center of the 400-m<sup>2</sup> plot. We used a clinometer to measure slope.

## 203 **Data compilation**

204

205 We applied the following equation to estimate regeneration attributes, i.e., seedling and sapling  
206 density, for black spruce and balsam fir:

$$207 \quad D = \sum_{i=1}^n R \times \frac{10\,000}{\sum_{i=1}^n S},$$

208 where  $D$  corresponds to the density per hectare,  $R$  is the number of seedlings or saplings sampled  
209 in each of the  $n$  plots surveyed, and  $S$  represents the surface (in m<sup>2</sup>) of each of the  $n$  plots.

210 (40) had previously computed several structural and environmental attributes for each of the  
211 sampled sites used in this study (**Table 1**). Some of these attributes relate to stand structure,  
212 including merchantable tree density, basal area, Weibull's shape parameter of diameter  
213 distribution (49), and gap fraction, i.e., the ratio between gap length and total transect length,  
214 sensu (50). Other attributes relate to stand composition, such as the basal area proportion of  
215 balsam fir. For estimating deadwood, (40) computed the volume of coarse woody debris per  
216 hectare using the formula of Marshall et al. (51); however for this study, we also calculated the  
217 basal area of snags, i.e., merchantable dead trees, at each study site, an attribute absent from the  
218 earlier (40) study. We evaluated forest succession from the minimum time since the last fire, i.e.,  
219 the age of the oldest tree sampled, and the cohort basal area proportion (CBAP; sensu 52). The  
220 latter attribute is an indicator of the stand transition from an even-aged to old-growth stage, i.e.,  
221 the stage where almost all trees of the first cohort following the last stand-replacing disturbance  
222 have disappeared. A CBAP  $\approx 0$  indicates a stand where all trees belong to the first cohort, and a

223 CBAP = 1 indicates a stand where the first cohort has been entirely replaced by a new shade-  
224 tolerant cohort. Finally, we detailed the topographic and pedologic characteristics of the studied  
225 stands using slope and the depth of the organic horizon.

226

227 **Table 1** Description of the regeneration, stand structure, and abiotic attributes sampled at the  
228 study sites as adapted from (40). “\*” indicates attributes computed by (40).

229

## 230 **Data analysis**

231

232 First, we performed k-means clustering (53) on black spruce and balsam fir regeneration  
233 attributes to identify the main patterns driving the regeneration dynamics of these two tree  
234 species in eastern Canadian boreal old-growth forests. To highlight the differences between the  
235 two species, we ran k-means clustering for each species separately. The clustering of black  
236 spruce regeneration relied on black spruce seedling and sapling densities of all 71 sites. Similarly,  
237 clustering of balsam fir regeneration also relied on balsam seedling and sapling densities;  
238 however, balsam fir seedlings and saplings were absent in 24 sites. We thus removed these sites  
239 for the clustering of balsam fir (47 plots remaining) to eliminate any influence from sites lacking  
240 this balsam fir regeneration. For each cluster analysis, we determined the optimal number of  
241 regeneration clusters using the simple structure index (SSI; 54) criterion. Separately for both  
242 species, we compared regeneration as well as the structural and environmental attributes within  
243 the clusters. We used analysis of variance (ANOVA) when the ANOVA conditions were fulfilled  
244 (data normality and homoscedasticity) or Kruskal-Wallis nonparametric analysis of variance  
245 when these conditions were not met. When ANOVA or the Kruskal-Wallis tests were  
246 significant, we performed a Tukey posthoc test (55) or a Fisher’s least significant difference test  
247 (56), respectively. Moreover, we also calculated Spearman’s rank correlation coefficient between

248 the regeneration and structural/environmental attributes. This latter analysis aimed to provide  
249 valuable information for interpreting our results by highlighting the strength of the relationship  
250 between regeneration and these various attributes.

251 All analyses were performed using R software, version 3.3.1 (57) and the *vegan* (58), *Hmisc* (59),  
252 and *agricolae* (60) packages, applying a *p*-threshold of 0.05.

## 253 **Results**

### 254 **Black spruce and balsam fir regeneration**

255  
256 For cluster analysis of black spruce regeneration, we determined eight as being the optimal  
257 number of clusters (SSI = 2.23; **Fig 3**). Black spruce seedling and sapling densities differed  
258 significantly between the black spruce regeneration clusters (BS; **Table 2A**). Black spruce  
259 seedling density was more than 8× higher in cluster BS8, having the highest density (26 543  
260 seedlings/ha), than in cluster BS1, characterized by the lowest seedling density values (3 008  
261 seedlings/ha). Black spruce seedling density did not differ between clusters BS4, BS5, and BS6.  
262 Regarding the density of black spruce saplings, cluster BS1—having the lowest values at 322  
263 saplings/ha—contained a sapling density 12× less than cluster BS5, which had the highest density  
264 of black spruce seedlings at 3 783 saplings/ha. The remaining clusters, characterized by  
265 intermediate values of black spruce sapling density, aligned along a gradient. We also observed  
266 significant differences in balsam fir seedling density between clusters. Concerning balsam fir  
267 seedling density within the clusters of black spruce regeneration, we observed significant  
268 differences, ranging from 873 seedlings/ha (lowest value, cluster BS7) to 9 720 seedlings/ha  
269 (highest value, cluster BS1); however, balsam fir sapling density did not differ significantly  
270 between the clusters.

271  
272 **Fig 3.** (A) Density of black spruce seedlings and saplings at the 71 studied sites, grouped by  
273 black spruce regeneration clusters. (B) Value of the SSI criterion according to the number of  
274 clusters for black spruce using k-means clustering. Filled circle in (B) indicates the highest value  
275 of the SSI criterion.

276  
277 **Table 2** Mean and standard error of the regeneration attributes for (A) black spruce regeneration  
278 clusters and (B) balsam fir regeneration clusters. Different letters indicate significant differences  
279 at  $p < 0.05$ , following  $a > b > c > d > e$ . BS: black spruce; BF: Balsam fir

280 Regarding balsam fir regeneration, two and four clusters produced an identical SSI criterion  
281 value of 1.14; **Fig 4.** Nonetheless, to obtain a more detailed evaluation of the dynamics of balsam  
282 fir regeneration, we chose to use four clusters (BF; **Table 2B**). Balsam fir seedling and sapling  
283 density varied markedly between clusters, and we identified significant differences for every  
284 attribute between the clusters. For example, the density of balsam fir seedlings within cluster  
285 BF4, marked by the highest seedling density at 18 740 seedlings/ha, was almost 20× that of the  
286 cluster having the lowest density of balsam fir seedlings (957 seedlings/ha; cluster BF1).  
287 Similarly, the highest density of balsam fir saplings (7 442 saplings/ha; cluster BF3) was 33× that  
288 of the cluster having the lowest density (223 saplings/ha; cluster BF1). Differences between  
289 clusters in terms of black spruce seedling or sapling density were less striking, although both  
290 attributes differed significantly between the clusters. Black spruce seedling density varied from 1  
291 900 to 14 379 seedlings/ha, whereas black spruce sapling density ranged from 470 to 1 670  
292 saplings/ha (clusters BF4 and BF1, respectively, for both cases).

293  
294 **Fig 4.** (A) Density of balsam fir seedlings and saplings at the 48 studied sites of the balsam fir  
295 regeneration portion of the study, grouped by balsam fir regeneration clusters. (B) Value of the  
296 SSI criterion according to the number of clusters for balsam fir using k-means clustering. Filled  
297 red circles in (B) indicate the highest value of the SSI criterion.

298

## 299 **Structural and environmental attributes**

300

301 Densities of black spruce seedlings and saplings both correlated positively with gap fraction,  
302 cohort basal area proportion, minimum time since the last fire, and depth of the organic horizon;  
303 both correlated negatively with slope (**Table 3**). Black spruce seedling density correlated  
304 negatively with basal area, balsam fir proportion, and maximum height. Balsam fir seedling and  
305 sapling densities correlated positively with balsam fir proportion, coarse woody debris volume,  
306 snag basal area, maximum height, and slope. Balsam fir seedling density also correlated  
307 significantly with basal area. In general, correlation coefficients tended to be relatively low even  
308 when significant; this was especially true for black spruce as no correlation coefficient between  
309 sapling density and gap fraction exceeded 0.5. These relatively low coefficient values indicate a  
310 relatively weak relationship between black spruce regeneration and the structural and  
311 environmental attributes. We observed, however, elevated correlation coefficients ( $\geq 0.5$ ) for  
312 balsam fir in relation to several structural and environmental attributes, including balsam fir  
313 proportion, slope, coarse woody debris volume (saplings only), and snag basal area (seedlings  
314 only).

315  
316 **Table 3** Spearman correlation coefficients between regeneration attributes and structural and  
317 environmental attributes. “\*” indicates significance at  $p < 0.05$ , “\*\*” at  $p < 0.01$ , and “\*\*\*\*” at  $p <$   
318 0.001.

319  
320 Black spruce regeneration clusters differed significantly from each other for many attributes,  
321 including basal area, gap fraction, minimum time since the last fire, slope, and depth of the  
322 organic horizon (**Table 4**). We identified marked differences between the study attributes and  
323 clusters; for example, basal area differed two-fold between cluster BS8 and cluster BS7, gap  
324 fraction values of cluster BS1 were more than double those of cluster BS5, the minimum time  
325 since the last fire varied from 146 (cluster BS1) to 249 years (cluster BS8), cluster BS8 has a 5×

326 higher slope than that of cluster BS1 (4.0% versus 23.4%, respectively), organic horizon depth  
327 varied from 16.0 cm (cluster BS1) to 47.9 cm (cluster BS8). Overall, clusters BS1 and BS8 were  
328 the most distinct clusters; the other clusters fell along a gradient between this pair of clusters.  
329 Cluster BS1 grouped stands located on steeper sites, characterized by a shallow organic horizon,  
330 a dense canopy, a high basal area, and relatively young trees. In contrast, cluster BS8 grouped  
331 stands having a gentle slope as well as a thick organic horizon, open canopy, low basal area, and  
332 older trees. The remaining clusters represented intermediate values between these two boundary  
333 clusters.

334 **Table 4** Mean and standard error of the structural and environmental attributes for black spruce  
335 regeneration clusters (BS). Different letters indicate significant differences at  $p < 0.05$ , following  
336  $a > b > c > d$ . BS: black spruce; BF: Balsam fir  
337

338 We noted significant differences between balsam fir regeneration clusters in terms of balsam fir  
339 proportion, coarse woody debris volume, snag basal area, and slope (**Table 5**). As with the black  
340 spruce regeneration clusters, two balsam fir regeneration clusters—clusters BF1 and BF4—  
341 represented opposite extremes along a gradient. Balsam fir proportion was almost 14× higher in  
342 cluster BF4 (56.7%) than in cluster BF1 (4.12%). Coarse woody debris volume in cluster BF3  
343 was more than double that of cluster BF1, at 61.6 and 155 m<sup>3</sup>/ha, respectively. Cluster BF4  
344 contained a snag basal area that was more than triple that of cluster BF1 (14 versus 3.9 m<sup>2</sup>/ha,  
345 respectively). Slope in cluster BF4 (28.4%) was also 4× higher than that in cluster BF1 (8.14%).  
346 All told, cluster BF1 represented sites having a gentle slope and lower balsam fir proportion, as  
347 well as a moderate coarse woody debris volume and snag basal area. Cluster BF3, on the other  
348 hand, grouped sites marked by steeper slopes, as well as higher values of balsam fir proportion,  
349 coarse woody debris volume, and snag basal area. As above, the remaining clusters fell between  
350 these two extreme clusters. Relative to the black spruce results, however, these two balsam fir  
351 clusters differed much less from each other; for example, we observed no significant differences

352 in coarse woody debris volume for clusters BF2, BF3, and BF4. This pattern implies that the  
353 structural differences within the balsam fir regeneration clusters were less noticeable than those  
354 observed in the black spruce stands.

355 **Table 5** Mean  $\pm$  standard deviation of structural and environmental attributes for balsam fir  
356 regeneration clusters (BF). Letters indicate significant differences at  $p < 0.05$ , following  $a > b >$   
357  $c$ .  
358

## 359 **Discussion**

360 Old-growth forests are critical habitats for biodiversity and ecosystem services. A better  
361 understanding of their functioning is therefore necessary for developing sustainable management  
362 strategies. The results of our study highlight that regeneration in boreal old-growth forests  
363 involves complex processes (non-linear, self-organized, disturbance-driven, structurally-  
364 dependent, etc.) that cannot be summarized along a single linear chronosequence of forest  
365 succession or by using a limited number of structural attributes as proxies. In general, we  
366 observed secondary disturbance regimes and topographic constraints as the main drivers of  
367 balsam fir and black spruce regeneration in our study stands. Temporal and spatial scales are  
368 therefore two important factors to explain the dynamics of tree regeneration in the boreal old-  
369 growth forests of eastern Canada.

## 370 **Dynamics of black spruce regeneration**

371  
372 The dynamics of black spruce regeneration in boreal old-growth forests involve highly complex  
373 processes. We observed highly variable seedling and sapling densities within the study stands,  
374 and specific structural attributes defined each black spruce regeneration cluster. These  
375 observations may explain the low Spearman correlation coefficients observed for black spruce, as  
376 its regeneration density depends on multiple and interrelated factors (10,15,61). Moreover, the



377 black spruce regeneration clusters present no significant differences in their cohort basal area  
378 proportions; therefore, differences between clusters did not result from succession toward an old-  
379 growth stage. We observed a significant difference between clusters in relation to minimum time  
380 since the last fire; however, this value generally exceeded 150 years, i.e., the threshold beyond  
381 which tree age becomes a poor indicator of stand age in boreal forests (62,63). As such, changes  
382 in stand structure due to secondary disturbance are more relevant for explaining regeneration  
383 dynamics rather than invoking the process of forest succession.

384 For black spruce, differences in the structural attributes between regeneration clusters testify to  
385 the influence of disturbance on seedling and sapling density (**Fig 5A**). As a starting point, cluster  
386 BS7 grouped dense old-growth forest stands found on gentle to medium slopes (0–7% and 8–  
387 24%, respectively). The stands in this cluster contained a moderate gap fraction and a high basal  
388 area, i.e., stands that have neither been recently nor significantly disturbed. Indeed, due to their  
389 narrow canopy, even dense old-growth black spruce stands can be characterized by a relatively  
390 high gap fraction (41). At this cluster’s successional stage, a low black spruce sapling density and  
391 high seedling density indicated a dense understory waiting for a canopy opening. This  
392 distribution of trees, saplings, and seedlings agrees with previous results (41,63) that identified a  
393 low suppressed tree density in old-growth stands that had a dense canopy and that were  
394 dominated by black spruce. It is quite likely that most of the black spruce seedlings sampled in  
395 the study sites represented layers rather than seeds. Indeed, this regeneration strategy is more  
396 effective on soils where most of the organic horizon is covered by a layer of mosses and organic  
397 matter (65). Moreover, these layers generally remain connected to the mother tree at this seedling  
398 stage and, thus, these layers likely remain under hormonal control with the process of apical  
399 dominance inhibiting their growth (lateral growth) (66–68).

400

401 **Fig 5.** Dynamics of (A) black spruce and (B) balsam fir regeneration according to secondary  
402 disturbance regime and topography as derived from the identified regeneration clusters. Water  
403 paintings by Valentina Buttò.  
404  
405 Overstory trees aged progressively and became increasingly sensitive to secondary disturbances  
406 and senescence-induced mortality (69–71). Cluster BS7 became cluster BS6, and black spruce  
407 sapling density began to increase. Overstory trees eventually died, creating gaps and decreasing  
408 the stand basal area. Black spruce regeneration individuals, including layers, are efficient gap-  
409 fillers (26,30,33), and these layers are no longer subject to apical control upon the death of the  
410 mother tree. Hence, most seedlings benefited from these openings to produce to a high sapling  
411 density, i.e., cluster BS6 shifted to cluster BS5. Saplings eventually reached the overstory and  
412 progressively closed the canopy. The result was a significant decrease in sapling density.  
413 However, we observed two different pathways depending on stand topography: gentle slopes  
414 (clusters BS4 and BS3, sapling growth and canopy closure, respectively) and moderate slopes  
415 (cluster BS2, sapling growth and canopy closure). Canopy closing finally led to an increased  
416 stand basal area, i.e., clusters BS2 and BS3 shifted toward cluster BS7, reinitiating the cycle.  
417 While we observed few changes in black spruce sapling density during this last transition,  
418 seedling density increased sharply, indicating the re-establishment of a dense understory layer  
419 awaiting the next canopy opening.  
420 The two remaining black spruce regeneration clusters both represented two specific abiotic  
421 conditions and dynamics. BS8 was defined by a gentle slope, a thick organic horizon, a high gap  
422 fraction, and a low basal area. These characteristics typify stands undergoing paludification—the  
423 accumulation of soil organic matter due to insufficient drainage resulting in a decreased stand  
424 productivity (72,73). Paludification inhibits tree growth, but not black spruce regeneration. As a  
425 result, black spruce sapling and seedling densities are often dense in paludified black spruce

426 stands, but these saplings and seedlings are unable to close the gaps caused by overstory tree  
427 death (29). Paludification, however, is a process limited to specific conditions, i.e., poor drainage  
428 and low temperatures; this process is not observed within well or moderately well-drained soils,  
429 i.e., stands having a minimum slope (74–76), explaining, therefore, the particularity of this  
430 cluster.

431 BS1, on the other hand, was defined by a shallow organic horizon, a steep slope, and a low gap  
432 fraction. This cluster presented the lowest black spruce seedling and sapling densities; this pattern  
433 matches prior observations in the study area that the abundance of black spruce decreases  
434 progressively as slope increases, eventually being replaced by balsam fir and northern hardwoods  
435 (40,45). Competition with balsam fir could explain the limited regeneration of black spruce on  
436 these steepest sites. However, another factor could be the thin organic horizon that reduces the  
437 survival of black spruce layers due to insufficient moisture, especially in the summer (77).  
438 Nonetheless, in sufficiently drained sites of more moderate slope, black spruce regeneration in  
439 old-growth forests presented a dynamic having four phases: 1) development of a dense seedling  
440 bank under a closed canopy; 2) rapid seedling growth once the overstory was disturbed and  
441 causing a decrease in seedling density and an increase in sapling density; 3) progressive canopy  
442 closure, implying a decrease in sapling density as saplings become merchantable trees; and 4) a  
443 return to phase 1.

## 444 **Balsam fir regeneration dynamics**

445  
446 Disentangling balsam fir regeneration dynamics in the study stands presented a greater challenge  
447 than that for black spruce dynamics as balsam fir regeneration was absent for 24 plots and sparse  
448 for the 28 sites belonging to cluster BF1. Several factors may explain the scarcity of balsam fir  
449 regeneration in most of the studied stands, such as soils being too wet or the stands having a

450 limited seed bank. In the sites characterized by relatively poor drainage, very wet and cold soils  
451 inhibit balsam fir seed germination and favor black spruce layering (78,79). In the study region,  
452 the fire cycle is shorter in the valley bottoms than on the hilltops (45), probably due to a later  
453 snowmelt at higher elevations. Balsam fir is not a fire-adapted species, and this tree often requires  
454 decades if not centuries to recolonize a burned area (80). Moreover, the dispersal of balsam fir  
455 seeds is relatively limited, and its occurrence requires proximal seed trees (15,39) as evidenced  
456 by the strong correlation observed between the proportion of balsam fir and the balsam fir  
457 regeneration density. Shorter fire cycles in the valley bottoms may thus inhibit the colonization of  
458 balsam fir in these areas of the study territory. Nevertheless, the absence of balsam fir in boreal  
459 old-growth stands is common in eastern Canada (19,20,40) because of all the factors explained  
460 previously; as such, sampling bias does not account for the results in our study.

461 We observed no significant difference between the balsam fir regeneration clusters in terms of  
462 the minimum time since the last fire and the cohort basal area proportion. As with the black  
463 spruce clusters, all balsam fir clusters represented the old-growth successional stage. Previous  
464 research of balsam fir regeneration dynamics in the boreal forests of eastern Canada focused on  
465 stands at the beginning of the transition toward the old-growth stage (e.g., 27,80,81). Our results  
466 underscore that once the old-growth stage is attained, and if seed trees are present nearby, the  
467 existing seed bank is sufficient to provide continuous regeneration of balsam fir (28,83).

468 Moreover, we observed significantly different stand slopes between the clusters, highlighting the  
469 importance of topography in explaining balsam fir stand dynamics (40). These results imply that  
470 as in the case of black spruce, secondary disturbance dynamics and topographic constraints drive  
471 balsam fir regeneration in the old-growth forests of eastern Canada.

472 For sites located on gentle slopes (0–8%), we observed two different balsam fir regeneration  
473 clusters. One cluster represented sites where balsam fir was almost absent from the canopy

474 (BF1), whereas the other cluster represented stands where balsam fir accounted for around 30%  
475 of the basal area (BF2). As a result, there was almost no balsam fir regeneration in BF1, while  
476 seedling and sapling densities were of moderate levels in BF2. Coarse woody debris volume was,  
477 however, higher in BF2 than BF1, suggesting more recent disturbances (**Fig 5B**). This involves a  
478 dynamic where boreal old-growth species composition switches between a pure black spruce  
479 stand and a mixed black spruce and balsam fir stand, possibly with the presence of white birch at  
480 a very low abundance (27,28). This type of dynamic is consistent with previous observations  
481 (28,40). Balsam fir is a competitive species that can quickly reach the upper canopy following a  
482 secondary disturbance (28,31). It is also very sensitive to disturbance, especially spruce budworm  
483 outbreaks, the main secondary disturbance agent in eastern Canadian boreal forests (37,84,85).  
484 Outbreaks of this insect heighten balsam fir mortality as spruce budworm larvae emergence is  
485 well synchronized with balsam fir budburst. In contrast, black spruce mortality during spruce  
486 budworm outbreaks is relatively low as black spruce budburst and larval emergence are poorly  
487 synchronized (86). The most severe budworm outbreaks cause significant mortality of the  
488 regeneration, in particular that of balsam fir (38,87,88). As a result, balsam fir abundance may  
489 decrease significantly in formerly mixed black spruce–balsam fir stands following an outbreak,  
490 although balsam fir may, with time, progressively recolonize the stand (20,21).

491 We observed no difference between the balsam fir regeneration clusters BF2 and BF3 in terms of  
492 coarse woody debris volume and proportion of balsam fir; this pattern represents dynamics in  
493 sites of moderate slope (i.e., 9–28%). However, the snag basal area was significantly higher in  
494 BF3. Relative to black spruce, balsam fir is also more vulnerable to windthrow and fungal rot  
495 (35,36). The presence of an important coarse woody debris volume in stands with an elevated  
496 balsam fir proportion in the canopy is therefore consistent with balsam fir ecology. However, a  
497 higher snag basal area can also indicate a relatively recent disturbance, as black spruce and

498 balsam fir snags often fell in the twenty years following a tree death (89). Hence, cluster BF3  
499 may group recently disturbed stands marked by a dynamic balsam fir regeneration that quickly  
500 fills the canopy (27,28,31). Once the canopy is closed, stand structure shifts to BF2, defined by a  
501 dense seedling bank.

502 Finally, BF3 and BF4 grouped stands on steep slopes (>28%), yet that no had significant  
503 structural differences between the two clusters. This result may reflect the low number of sites  
504 sampled for both clusters (3 and 5 sites, respectively). However, it is also probable that they  
505 represented a balsam fir regeneration dynamic similar to that observed on moderate slopes, with  
506 BF3 grouping recently disturbed stands and the BF4 grouping the resilient stands. On  
507 intermediate slopes, black spruce regeneration continued to compete with balsam fir, thereby  
508 explaining the intermediate balsam fir seedling density in BF2. On steep slopes, however, balsam  
509 fir dominated the canopy. It is therefore likely that these stands were driven by regular small- and  
510 moderate-scale disturbances (26), resulting in recurrent deadwood inputs and active  
511 regeneration/mortality phases.

## 512 **Conclusion**

513 This study determined how secondary disturbance regimes and topographic constraints explain  
514 the dynamics of black spruce and balsam fir regeneration in old-growth forests. Thus, our study  
515 refutes a classic assumption in forest science by demonstrating that the standard linear and  
516 theoretical paradigms (successional stages) are not able to explain the complexity of old-growth  
517 forest dynamics where many ecological factors interact at multiple temporal and spatial scales.

518 Second, this study provides a better acknowledgment of the importance of regeneration dynamics  
519 in the boreal old-growth forests of eastern Canada. Disturbance dynamics in these ecosystems  
520 are, however, defined by disturbances that vary in terms of type, frequency, and severity (26,71).

521 Thus, our results highlight the overall trends of regeneration dynamics in old-growth forests, and  
522 further research is required to determine how these trends may change depending on disturbance  
523 characteristics.  
524 Third, sustainable forest management aims to develop new silvicultural treatments to minimize  
525 differences between natural and managed stands. For this, partial cuttings offer a promising  
526 solution to adapt forestry practices to act in a similar manner as secondary disturbance regimes.  
527 These treatments, however, must be adapted to conditions within the eastern Canadian forest (90–  
528 93). The results of our study provide new guidelines for a forest management approach that  
529 brings the regeneration dynamics within managed stands closer to those of boreal old-growth  
530 forests.

## 531 **Acknowledgments**

532 We thank Audrey Bédard, Jean-Guy Girard, Émilie Chouinard, Anne-Élizabeth Harvey, Aurélie  
533 Cuvelière, Évelyn Beliën, and Angelo Fierravanti for their precious help during field sampling.  
534 Yan Boucher and Pierre Grondin from Quebec’s Ministry of Forests, Fauna, and Parks (MFFP)  
535 provided the data collected from the study territory. We also thank Valentina Buttò for her water  
536 paintings, used in Figure 4 of this paper.

## 537 **References**

- 538 1. Achard F, Eva H, Mollicone D, Popatov P, Stibig H-J, Turubanova S, et al. Detecting  
539 intact forests from space: hot spots of loss, deforestation and the UNFCCC. In: Wirth C,  
540 Gleixner G, Heimann M, editors. Old-growth forests: Function, fate and value. Ecological.  
541 Berlin: Springer-Verlag; 2009. p. 411–28.
- 542 2. Gauthier S, Bernier P, Kuuluvainen T, Shvidenko AZ, Schepaschenko DG. Boreal forest  
543 health and global change. *Science* (80- ). 2015;349(6250):819–22.
- 544 3. Watson JEM, Evans T, Venter O, Williams B, Tulloch A, Stewart C, et al. The exceptional

- 545 value of intact forest ecosystems. *Nat Ecol Evol.* 2018;2(4):599–610.
- 546 4. Halme P, Allen KA, Auniš A, Bradshaw RHW, Brumelis G, Čada V, et al. Challenges of  
547 ecological restoration: Lessons from forests in northern Europe. *Biol Conserv.*  
548 2013;167:248–56.
- 549 5. Cyr D, Gauthier S, Bergeron Y, Carcaillet C. Forest management is driving the eastern  
550 North American boreal forest outside its natural range of variability. *Front Ecol Environ.*  
551 2009;7(10):519–24.
- 552 6. Karjalainen E, Sarjala T, Raitio H. Promoting human health through forests: Overview and  
553 major challenges. *Environ Health Prev Med.* 2010;15(1):1–8.
- 554 7. Forest Europe. State of Europe’s forests 2015. Madrid; 2015.
- 555 8. Oliver CD, Larson BC. *Forest Stand Dynamics*. 4th ed. New York: John Wiley & Sons,  
556 Inc.; 1996. 520 p.
- 557 9. Larouche C, Raymond P, Guillemette F. Les concepts et les traitements sylvicoles. In:  
558 [MRN] Ministère des ressources naturelles du Québec, editor. *Le Guide Sylvicole du*  
559 *Québec, tome 2, Les concepts et l’application de la sylviculture*. Québec: Les Publications  
560 du Québec; 2013. p. 10–31.
- 561 10. Messier C, Doucet R, Ruel JC, Claveau Y, Kelly C, Lechowicz MJ. Functional ecology of  
562 advance regeneration in relation to light in boreal forests. *Can J For Res.* 1999;29(6):812–  
563 23.
- 564 11. Greene DF, Zasada JC, Sirois L, Kneeshaw DD, Morin H, Charron I, et al. A review of the  
565 regeneration dynamics of North American boreal forest tree species. *Can J For Res.*  
566 1999;29(6):824–39.
- 567 12. Lawson SS, Michler CH. Afforestation, restoration and regeneration - Not all trees are  
568 created equal. *J For Res.* 2014;25(1):3–20.
- 569 13. Zhu J, Lu D, Zhang W. Effects of gaps on regeneration of woody plants: A meta-analysis.  
570 *J For Res.* 2014;25(3):501–10.
- 571 14. Muscolo A, Settineri G, Bagnato S, Mercurio R, Sidari M. Use of canopy gap openings to  
572 restore coniferous stands in mediterranean environment. *IForest.* 2017;10(1):322–7.
- 573 15. Montoro Girona M, Lussier J-M, Morin H, Thiffault N. Conifer regeneration after  
574 experimental shelterwood and seed-tree treatments in boreal forests: finding silvicultural  
575 alternatives. *Front Plant Sci.* 2018;9(August):1–14.
- 576 16. Stevens-Rumann CS, Morgan P. Tree regeneration following wildfires in the western US:  
577 a review. *Fire Ecol.* 2019;15(1):1–17.
- 578 17. Boucher Y, Perrault-Hébert M, Fournier R, Drapeau P, Auger I. Cumulative patterns of



- 579 logging and fire (1940–2009): consequences on the structure of the eastern Canadian  
580 boreal forest. *Landsc Ecol.* 2017;32(2):361–75.
- 581 18. Grondin P, Gauthier S, Poirier V, Tardif P, Boucher Y, Bergeron Y. Have some  
582 landscapes in the eastern Canadian boreal forest moved beyond their natural range of  
583 variability? *For Ecosyst.* 2018;5(1): 17p.
- 584 19. Harvey BD, Leduc A, Gauthier S, Bergeron Y. Stand-landscape integration in natural  
585 disturbance-based management of the southern boreal forest. *For Ecol Manage.*  
586 2002;155(1–3):369–85.
- 587 20. Gauthier S, Boucher D, Morissette J, De Grandpré L. Fifty-seven years of composition  
588 change in the eastern boreal forest of Canada. *J Veg Sci.* 2010;21(4):772–85.
- 589 21. De Grandpré L, Gauthier S, Allain C, Cyr D, Pérignon S, Pham AT, et al. Towards an  
590 ecosystem approach to managing the boreal forest in the North Shore Region: disturbance  
591 regime and natural forest dynamics. In: *Ecosystem management in the boreal forest*. 1st  
592 edition. Québec: Presses de l'Université du Québec; 2009. p. 229–55.
- 593 22. Kuuluvainen T, Gauthier S. Young and old forest in the boreal: critical stages of  
594 ecosystem dynamics and management under global change. *For Ecosyst.* 2018;5(1): 15p.
- 595 23. Martin M, Boucher Y, Fenton NJ, Marchand P, Morin H. Forest management has reduced  
596 the structural diversity of residual boreal old-growth forest landscapes in Eastern Canada.  
597 *For Ecol Manage.* 2020;458:1–10.
- 598 24. Morin H, Gagnon R. Structure et croissance de peuplements d'épinette noire issus de  
599 regeneration preetablie, une quarantaine d'annees apres coupe au Lac Saint-Jean, Quebec.  
600 *For Chron.* 1991;67(3):275–83.
- 601 25. McCarthy JW, Weetman G. Age and size structure of gap-dynamic, old-growth boreal  
602 forest stands in Newfoundland. *Silva Fenn.* 2006;40(2):209–30.
- 603 26. Martin M, Morin H, Fenton NJ. Secondary disturbances of low and moderate severity  
604 drive the dynamics of eastern Canadian boreal old-growth forests. *Ann For Sci.*  
605 2019;76(108):1–16.
- 606 27. Kneeshaw DD, Bergeron Y. Canopy gap characteristics and tree replacement in the  
607 southeastern boreal forest. *Ecology.* 1998;79(3):783–94.
- 608 28. Pham AT, De Grandpré L, Gauthier S, Bergeron Y. Gap dynamics and replacement  
609 patterns in gaps of the northeastern boreal forest of Quebec. *Can J For Res.*  
610 2004;34(2):353–64.
- 611 29. St-Denis A, Kneeshaw DD, Bergeron Y. The role of gaps and tree regeneration in the  
612 transition from dense to open black spruce stands. *For Ecol Manage.* 2010;259(3):469–76.
- 613 30. Rossi S, Tremblay M-J, Morin H, Levasseur V. Stand structure and dynamics of *Picea*

- 614 mariana on the northern border of the natural closed boreal forest in Quebec, Canada. Can  
615 J For Res. 2009;39:2307–18.
- 616 31. Girard F, De Grandpré L, Ruel JC. Partial windthrow as a driving process of forest  
617 dynamics in old-growth boreal forests. Can J For Res. 2014;44(10):1165–76.
- 618 32. Morin H, Gagnon R. Comparative growth and yield of layer- and seed-origin black spruce  
619 (*Picea mariana*) stands in Quebec. Can J For Res. 1992;22:465–73.
- 620 33. Prévost M, Dumais D. Long-term growth response of black spruce advance regeneration  
621 (layers), natural seedlings and planted seedlings to scarification: 25th year update. Scand J  
622 For Res. 2018;33(6):1–11.
- 623 34. Pothier D, Doucet R, Boily J. The effect of advance regeneration height on future yield of  
624 black spruce stands. Can J For Res. 1995;25:536–44.
- 625 35. Basham JT. Stem decay in living trees in Ontario’s forests: a user’s compendium and  
626 guide. Information Report Ontario Region, Forestry Canada. 1991. iv + 64 pp.
- 627 36. Ruel J. Factors influencing windthrow in balsam fir forests: from landscape studies to  
628 individuel tree studies. For Ecol Manag. 2000;135:169–78.
- 629 37. Morin H, Laprise D, Simon AA, Amouch S. Spruce budworm outbreak regimes in in  
630 eastern North America. In: Gauthier S, Vaillancourt M-A, Leduc A, Grandpré L De,  
631 Kneeshaw DD, Morin H, et al., editors. Ecosystem management in the boreal forest.  
632 Québec: Les Presses de l’Université du Québec; 2009. p. 156–82.
- 633 38. Lavoie J, Girona MM, Morin H. Vulnerability of conifer regeneration to spruce budworm  
634 outbreaks in the eastern Canadian boreal forest. Forests. 2019;10(850); 1–14.
- 635 39. Messaoud Y, Goudiaby V, Bergeron Y. Persistence of balsam fir and black spruce  
636 populations in the mixedwood and coniferous bioclimatic domain of eastern North  
637 America. Ecol Evol. 2019;(February): 1-15.
- 638 40. Martin M, Fenton NJ, Morin H. Structural diversity and dynamics of boreal old-growth  
639 forests case study in Eastern Canada. For Ecol Manage. 2018;422(April):125–36.
- 640 41. Martin M, Fenton NJ, Morin H. Boreal old-growth forest structural diversity challenges  
641 aerial photographic survey accuracy. Can J For Res. 2020;50:155–69.
- 642 42. Gauthier S, Vaillancourt M-A, Leduc A, Grandpré L De, Kneeshaw DD, Morin H, et al.  
643 Ecosystem management in the boreal forest. Québec: Presses de l’Université du Québec;  
644 2009. 572 p.
- 645 43. Blouin J, Berger J-P. Guide de reconnaissance des types écologiques - Région écologique  
646 6c (Plaine du lac Opémisca) - Région écologique 6d (Coteaux du lac Assinica) - Région  
647 écologique 6e (Coteaux de la rivière Nestaocano) - Région écologique 6f (Coteaux du lac  
648 Mistassini). Ministère des Ressources naturelles, de la Faune et des Parcs, Forêt Québec,

- 649 Direction des inventaires forestiers, Division de la classification écologique et productivité  
650 des stations; 2004. 210 p.
- 651 44. Bergeron J-F, Grondin P, Blouin J. Rapport de classification écologique du sous-domaine  
652 bioclimatique de la pessière à mousses de l'ouest. Ministère des Ressources Naturelles du  
653 Québec. Direction des inventaires forestiers. 1998: 204 p.
- 654 45. Couillard P-L, Frégeau M, Payette S, Grondin P, Lavoie M, Laflamme J. Dynamique et  
655 variabilité naturelle de la pessière à mousses au nord de la région du Lac-Saint-Jean.  
656 Québec. Ministère des Forêts, de la Faune et des Parcs, Secteur des forêts, Direction des  
657 inventaires forestiers; 2016, 35 p.
- 658 46. Uhlig PA, Harris G, Craig C, Bowling B, Chambers B, Naylor B, et al. Old-growth forest  
659 definitions for Ontario. Ontario Ministry of Natural Resources, editor. Queen's Printer for  
660 Ontario; 2001. 27 p.
- 661 47. Bergeron Y, Harper KA. Old-growth forests in the Canadian boreal: the exception rather  
662 than the rule? In: Wirth C, Gleixner G, Heimann M, editors. Old-growth forests: function,  
663 fate and value. Ecological studies. New York: Springer; 2009. p. 285–300.
- 664 48. [MFFP] Ministère de la Forêt de la faune et des Parcs. Norme d'inventaire écoforestier.  
665 Placettes-échantillons temporaires. Québec: Direction des Inventaires Forestiers, Ministère  
666 de la Forêt, de la Faune et des Parcs; 2016. 254 p.
- 667 49. Bailey RL, Dell R. Quantifying diameter distributions with the Weibull function. *For Sci.*  
668 1973;19(2):97–104.
- 669 50. Battles JJ, Dushoff JG, Fahey TJ. Line intersect sampling of forest canopy gaps. *For Sci.*  
670 1996;42(2):131–8.
- 671 51. Marshall PL, Davis G, LeMay VM. Using Line Intersect Sampling for Coarse Woody  
672 Debris. Forest Service British Columbian, Vancouver Forest Region, Nanaimo, British  
673 Columbia, Canada; 2000, 34 p.
- 674 52. Kneeshaw DD, Gauthier S. Old growth in the boreal forest: A dynamic perspective at the  
675 stand and landscape level. *Environ Rev.* 2003;11(S1):S99–114.
- 676 53. Hartigan JA, Wong MA. Algorithm AS 136 : a k-means clustering algorithm. *J R Stat Soc.*  
677 1979;28(1):100–8.
- 678 54. Dolnicar S. Analyzing destination images: a perceptual charting approach. *J. Travel Tour.*  
679 *Mark.* 1999;8(4):43–57.
- 680 55. Tukey JW. Exploratory data analysis. Addison-Weasley, editor. Pearson; 1977. 688 p.
- 681 56. Williams LJ, Abdi H. Fisher's least significant difference test. In: Salkind N, editor.  
682 *Encyclopedia of Research Design.* SAGE; 2010. p. 1–6.

- 683 57. R Core Team. R: A language and environment for statistical computing. Vienna, Austria:  
684 R Foundation for Statistical Computing; 2019. Available from: <https://www.r-project.org/>
- 685 58. Oksanen J, Blanchet G, Friendly M, Kindt R, Legendre P, MCGlenn D, et al. vegan:  
686 community ecology package. 2018. Available from: [https://cran.r-](https://cran.r-project.org/package=vegan)  
687 [project.org/package=vegan](https://cran.r-project.org/package=vegan)
- 688 59. Harrel FE. Hmisc: Harrell miscellaneous. 2019. Available from: [https://cran.r-](https://cran.r-project.org/package=Hmisc)  
689 [project.org/package=Hmisc](https://cran.r-project.org/package=Hmisc)
- 690 60. de Mendiburu F. Agricolae: statistical procedures for agricultural research. R package  
691 version 1.2-8. 2017.
- 692 61. Ménard LP, Ruel JC, Thiffault N. Abundance and impacts of competing species on conifer  
693 regeneration following careful logging in the eastern Canadian boreal forest. *Forests*.  
694 2019;10(2).
- 695 62. Marchand W, DesRochers A. Temporal variability of aging error and its potential effects  
696 on black spruce site productivity estimations. *For Ecol Manage*. 2016;369:47–58.
- 697 63. Garet J, Raulier F, Pothier D, Cumming SG. Forest age class structures as indicators of  
698 sustainability in boreal forest: Are we measuring them correctly? *Ecol Indic*. 2012;23:202–  
699 10.
- 700 64. Rheault H. Contribution des vieilles pessières noires au maintien de la biodiversité. Faculté  
701 de foresterie et de géomatique, Université Laval; 2007, 135 p.
- 702 65. Viereck LA, Johnson WF. *Picea mariana* (Mill) B.S.P. — Black Spruce. In: Service  
703 USDAF, editor. *Silvics of North America, Vol.1 Conifers*. Washington D.C.; 1990. p.  
704 227–37.
- 705 66. Wilson BF. Apical control of branch growth and angle in woody plants. *Am J Bot*.  
706 2000;87(5):601–7.
- 707 67. Pallardy SG, Kozlowski TT. *Physiology of woody plants*. 3rd edition. Amsterdam:  
708 Elsevier; 2008. 454 p.
- 709 68. Agusti J, Herold S, Schwarz M, Sanchez P, Ljung K, Dun EA, et al. Strigolactone  
710 signaling is required for auxin-dependent stimulation of secondary growth in plants. *Proc*  
711 *Natl Acad Sci USA*. 2011;108(50):20242–7.
- 712 69. Robichaud E, Methven IR. The effect of site quality on the timing of stand breakup, tree  
713 longevity, and the maximum attainable height of black spruce. *Can J For Res*.  
714 1993;(23):1514–9.
- 715 70. Lussier J, Morin H, Gagnon R. Mortality in black spruce stands of fire or clear-cut origin.  
716 *Canada J For Res*. 2002;547:539–47.

- 717 71. De Grandpré L, Waldron K, Bouchard M, Gauthier S, Beaudet M, Ruel JC, et al.  
718 Incorporating insect and wind disturbances in a natural disturbance-based management  
719 framework for the boreal forest. *Forests*. 2018;9(8):1–20.
- 720 72. Fenton NJ, Lecomte N, Légaré S, Bergeron Y. Paludification in black spruce (*Picea*  
721 *mariana*) forests of eastern Canada: Potential factors and management implications. *For*  
722 *Ecol Manage*. 2005;213(1–3):151–9.
- 723 73. Bergeron Y, Fenton NJ. Boreal forests of eastern Canada revisited: old growth, nonfire  
724 disturbances, forest succession, and biodiversity. *Botany*. 2012;90(6):509–23.
- 725 74. Garet J, Pothier D, Bouchard M. Predicting the long-term yield trajectory of black spruce  
726 stands using time since fire. *For Ecol Manage*. 2009;257(10):2189–97.
- 727 75. Pollock SL, Payette S. Stability in the patterns of long-term development and growth of  
728 the Canadian spruce-moss forest. *J Biogeogr*. 2010;37(9):1684–97.
- 729 76. Ward C, Pothier D, Pare D. Do boreal forests need fire disturbance to maintain  
730 productivity ? *Ecosystems*. 2014;17:1053–67.
- 731 77. Drobyshhev I, Simard M, Bergeron Y, Hofgaard A. Does soil organic layer thickness affect  
732 climate-growth relationships in the black spruce boreal ecosystem? *Ecosystems*.  
733 2010;13(4):556–74.
- 734 78. Messaoud Y, Bergeron Y, Leduc A. Ecological factors explaining the location of the  
735 boundary between the mixedwood and coniferous bioclimatic zones in the boreal biome of  
736 eastern North America. *Glob Ecol Biogeogr*. 2007;16(1):90–102.
- 737 79. Messaoud Y, Asselin H, Bergeron Y, Grondin P. Competitive advantage of black spruce  
738 over balsam fir in coniferous boreal forest of eastern North America revealed by Site  
739 Index. *For Sci*. 2014;60(1):57–62.
- 740 80. Bouchard M, Pothier D. Simulations of the effects of changes in mean fire return intervals  
741 on balsam fir abundance, and implications for spruce budworm outbreaks. *Ecol Model*.  
742 2008;218(3–4):207–18.
- 743 81. Morin H, Laprise D. Seedling bank dynamics in boreal balsam fir forests. *Can J For Res*.  
744 1997;27(9):1442–51.
- 745 82. Duchesneau R, Morin H. Early seedling demography in balsam fir seedling banks. *Can J*  
746 *For Res*. 1999;29(10):1502–9.
- 747 83. Despons M, Brunet G, Bélanger L, Bouchard M. The eastern boreal old-growth balsam fir  
748 forest : a distinct ecosystem. *Can J Bot*. 2004;82:830–49.
- 749 84. Montoro Girona M, Navarro L, Morin H. A secret hidden in the sediments: Lepidoptera  
750 scales. *Front Ecol Evol*. 2018;6(JAN):1–5.

- 751 85. Shorohova E, Kneeshaw DD, Kuuluvainen T, Gauthier S. Variability and dynamics of old-  
752 growth forests in the circumboreal zone: implications for conservation, restoration and  
753 management. *Silva Fenn.* 2011;45(5):785–806.
- 754 86. Pureswaran DS, Neau M, Marchand M, De Grandpré L, Kneeshaw D. Phenological  
755 synchrony between eastern spruce budworm and its host trees increases with warmer  
756 temperatures in the boreal forest. *Ecol Evol.* 2018;(December):1–11.
- 757 87. Cotton-Gagnon A, Simard M, De Grandpré L, Kneeshaw D. Salvage logging during  
758 spruce budworm outbreaks increases defoliation of black spruce regeneration. For *Ecol*  
759 *Manage.* 2018;430(May):421–30.
- 760 88. Nie Z, MacLean DA, Taylor AR. Forest overstory composition and seedling height  
761 influence defoliation of understory regeneration by spruce budworm. For *Ecol Manage.*  
762 2018;409(September 2017):353–60.
- 763 89. Angers VA, Drapeau P, Bergeron Y. Snag degradation pathways of four North American  
764 boreal tree species. For *Ecol Manage.* 2010; 259(3):246–56.
- 765 90. Fenton NJ, Imbeau L, Work T, Jacobs J, Bescond H, Drapeau P, et al. Lessons learned  
766 from 12 years of ecological research on partial cuts in black spruce forests of northwestern  
767 Québec. For *Chron.* 2014;89(03):350–9.
- 768 91. Montoro Girona M, Morin H, Lussier J, Walsh D. Radial growth response of black spruce  
769 stands ten years after experimental shelterwoods and seed-tree cuttings in boreal forest.  
770 *Forests.* 2016;7:240.
- 771 92. Montoro Girona M, Rossi S, Lussier J, Walsh D, Morin H. Understanding tree growth  
772 responses after partial cuttings : A new approach. *PLoS One.* 2017;12(2):1–18.
- 773 93. Montoro Girona M, Morin H, Lussier J-M, Ruel J-C. Post-cutting mortality following  
774 experimental silvicultural treatments in unmanaged boreal forest stands. *Front Forest Glob*  
775 *Chang.* 2019;2(March):4,16 p.
- 776
- 777

778 **Tables and figures**

779

780 **Table 1** Description of the regeneration, stand structure, and abiotic attributes sampled at the study sites as  
 781 adapted from Martin et al. (2018). “\*” indicates attributes computed by Martin et al. (2018).

782

| Category                      | Attribute                     | Unit                                                                                                                                                                                                                                                                                                      | Description                                                                                                                                                                                                                                                                                                                                  |
|-------------------------------|-------------------------------|-----------------------------------------------------------------------------------------------------------------------------------------------------------------------------------------------------------------------------------------------------------------------------------------------------------|----------------------------------------------------------------------------------------------------------------------------------------------------------------------------------------------------------------------------------------------------------------------------------------------------------------------------------------------|
| Regeneration                  | Black spruce seedling density | n/ha                                                                                                                                                                                                                                                                                                      | Number of living black spruce seedlings per hectare                                                                                                                                                                                                                                                                                          |
|                               | Black spruce sapling density  | n/ha                                                                                                                                                                                                                                                                                                      | Number of living black spruce saplings per hectare                                                                                                                                                                                                                                                                                           |
|                               | Balsam fir seedling density   | n/ha                                                                                                                                                                                                                                                                                                      | Number of living balsam seedlings per hectare                                                                                                                                                                                                                                                                                                |
|                               | Balsam fir sapling density    | n/ha                                                                                                                                                                                                                                                                                                      | Number of living balsam fir saplings per hectare                                                                                                                                                                                                                                                                                             |
| Stand structure               | Tree density*                 | n/ha                                                                                                                                                                                                                                                                                                      | Number of living merchantable stems per hectare                                                                                                                                                                                                                                                                                              |
|                               | Basal area*                   | m <sup>2</sup> /ha                                                                                                                                                                                                                                                                                        | Basal area of the living merchantable trees per hectare                                                                                                                                                                                                                                                                                      |
|                               | Balsam fir proportion*        | %                                                                                                                                                                                                                                                                                                         | Proportion of balsam fir in the basal area                                                                                                                                                                                                                                                                                                   |
|                               | Coarse woody debris volume*   | m <sup>3</sup> /ha                                                                                                                                                                                                                                                                                        | Coarse woody debris volume per hectare                                                                                                                                                                                                                                                                                                       |
|                               | Snag basal area               | m <sup>2</sup> /ha                                                                                                                                                                                                                                                                                        | Basal area of the dead merchantable trees per hectare                                                                                                                                                                                                                                                                                        |
|                               | Gap fraction*                 | %                                                                                                                                                                                                                                                                                                         | Mean percentage of the canopy under gaps                                                                                                                                                                                                                                                                                                     |
|                               | Stand height*                 | m                                                                                                                                                                                                                                                                                                         | Mean height value of the dominant trees sampled at each site                                                                                                                                                                                                                                                                                 |
|                               | Weibull’s shape parameter*    | -                                                                                                                                                                                                                                                                                                         | Weibull’s function shape parameter (WSP, Bailey and Dell 1973), based on the diameter distribution of saplings and merchantable trees. A WSP of $\geq 1.5$ represents a Gaussian distribution of the diameters, $1 \leq \text{WSP} < 1.5$ reflects an irregular distribution, and $\text{WSP} < 1$ describes a reverse J-shaped distribution |
| Cohort basal area proportion* | -                             | Replacement index of the even-aged cohort by old-growth cohorts, as defined by Kneeshaw and Gauthier (2003), and values range from 0 to 1. CBAP = 0 indicates a stand having a single even-aged cohort, and CBAP = 1 indicates a stand where old-growth cohorts have replaced all of the even-aged cohort |                                                                                                                                                                                                                                                                                                                                              |
| Abiotic                       | Minimum time since last fire* | years                                                                                                                                                                                                                                                                                                     | Age of the oldest tree                                                                                                                                                                                                                                                                                                                       |
|                               | Slope                         | %                                                                                                                                                                                                                                                                                                         | Mean slope value along the 400 m <sup>2</sup> square plot                                                                                                                                                                                                                                                                                    |
|                               | Depth of the organic horizon* | cm                                                                                                                                                                                                                                                                                                        | Mean depth of the organic horizon along the soil profile                                                                                                                                                                                                                                                                                     |

783

**Table 2** Mean and standard error of the regeneration attributes for (A) black spruce regeneration clusters and (B) balsam fir regeneration clusters. Different letters indicate significant differences at  $p < 0.05$ , following  $a > b > c > d > e$ . BS: black spruce; BF: Balsam fir

**A: Black spruce regeneration**

| Cluster                              | BS1 (n=10)      | BS2 (n = 11)     | BS3 (n = 17)     | BS4 (n = 6)     | BS5 (n = 3)      | BS6 (n = 11)     | BS7 (n = 6)      | BS8 (n = 7)      |
|--------------------------------------|-----------------|------------------|------------------|-----------------|------------------|------------------|------------------|------------------|
| Black spruce seedling density (n/ha) | 3 080 ± 1 959 e | 4 882 ± 2 177 d  | 10 906 ± 2 096 c | 9 683 ± 2 048 c | 11 267 ± 1 582 c | 17 836 ± 2 777 b | 21 850 ± 3 365 a | 26 543 ± 4 295 a |
| Black spruce sapling density (n/ha)  | 322 ± 257 f     | 1 175 ± 251 d    | 1 019 ± 286 d    | 2 233 ± 353 bc  | 3 783 ± 484 a    | 1 773 ± 269 c    | 742 ± 277 e      | 3 082 ± 532 ab   |
| Balsam fir seedling density (n/ha)   | 9 720 ± 7 920 a | 5 773 ± 7 621 ab | 1 835 ± 4 253 c  | 1 917 ± 4 224 c | 3 333 ± 5 687 ac | 873 ± 2 039 c    | 6 317 ± 8 655 ab | 2 357 ± 5 474 bc |
| Balsam fir sapling density (n/ha)    | 1 492 ± 1 499   | 2 516 ± 3 374    | 228 ± 495        | 500 ± 765       | 608 ± 1 032      | 125 ± 357        | 592 ± 668        | 200 ± 416        |

**B: Balsam fir regeneration**

| Cluster                              | BF1 (n = 28)     | BF2 (n = 11)      | BF3 (n = 3)       | BF4 (n = 5)      |
|--------------------------------------|------------------|-------------------|-------------------|------------------|
| Black spruce seedling density (n/ha) | 14 379 ± 7 824 a | 10 773 ± 9 688 ab | 1 900 ± 794 b     | 9 180 ± 7 258 ab |
| Black spruce sapling density (n/ha)  | 1 670 ± 1 025 a  | 1 282 ± 1 131 ab  | 1 283 ± 388 ab    | 470 ± 151 b      |
| Balsam fir seedling density (n/ha)   | 957 ± 1 520 c    | 9 827 ± 3 243 b   | 1 6267 ± 5 460 ab | 1 8740 ± 2 756 a |
| Balsam fir sapling density (n/ha)    | 223 ± 397 c      | 1 464 ± 683 b     | 7 442 ± 1 934 a   | 2 590 ± 1 066 ab |



**Table 3** Spearman correlation coefficients between regeneration attributes and structural and environmental attributes. “\*” indicates significance at  $p < 0.05$ , “\*\*” at  $p < 0.01$  and “\*\*\*” at  $p < 0.001$ .

| Category  | Attribute                                       | Black spruce |          | Balsam fir |          |
|-----------|-------------------------------------------------|--------------|----------|------------|----------|
|           |                                                 | Seedlings    | Saplings | Seedlings  | Saplings |
| Structure | Tree density (n/ha)                             | 0.18         | -0.09    | 0.14       | 0.10     |
|           | Basal area (m <sup>2</sup> /ha)                 | -0.09        | -0.49*** | 0.36*      | 0.17     |
|           | Balsam fir proportion (%)                       | -0.21        | -0.26*   | 0.80***    | 0.86***  |
|           | Gap fraction (%)                                | 0.34**       | 0.51***  | -0.17      | -0.02    |
|           | Weibull's shape parameter                       | 0.05         | 0.16     | -0.19      | -0.09    |
|           | Coarse woody debris volume (m <sup>3</sup> /ha) | -0.11        | -0.07    | 0.44**     | 0.61***  |
|           | Snag basal area (m <sup>2</sup> /ha)            | -0.21        | -0.21    | 0.55***    | 0.48***  |
|           | Maximum height (m)                              | -0.12        | -0.31**  | 0.39**     | 0.33*    |
|           | Cohort basal area proportion                    | 0.32**       | 0.24*    | 0.08       | 0.07     |
| Abiotic   | Minimum time since the last fire (years)        | 0.43***      | 0.32**   | -0.19      | -0.22    |
|           | Slope (%)                                       | -0.29*       | -0.37**  | 0.59***    | 0.56***  |
|           | Depth of the organic horizon (cm)               | 0.41***      | 0.32**   | -0.17      | -0.10    |

**Table 4** Mean and standard error of the structural and environmental attributes for black spruce regeneration clusters (BS). Different letters indicate significant differences at  $p < 0.05$ , following  $a > b > c > d$ . BS: black spruce; BF: Balsam fir

| Cluster                                         | BS1              | BS2               | BS3               | BS4               | BS5               | BS6               | BS7               | BS8              |
|-------------------------------------------------|------------------|-------------------|-------------------|-------------------|-------------------|-------------------|-------------------|------------------|
| Tree density (n/ha)                             | 790.00 ± 332.00  | 950.00 ± 392.00   | 899.00 ± 283.00   | 925.00 ± 569.00   | 600.00 ± 563.00   | 1 068.00 ± 382.00 | 1 162.00 ± 423.00 | 832 ± 399        |
| Basal area (m <sup>2</sup> /ha)                 | 23.20 ± 9.93 ab  | 18.10 ± 5.16 abc  | 17.20 ± 5.83 bc   | 12.40 ± 7.47 cd   | 10.40 ± 8.84 cd   | 16.60 ± 5.85 bcd  | 25.10 ± 7.01 a    | 11.10 ± 4.32 d   |
| Balsam fir proportion (%)                       | 35.20 ± 34.30    | 20.00 ± 23.90     | 3.60 ± 7.64       | 6.91 ± 12.80      | 8.79 ± 12.40      | 3.99 ± 10.10      | 22.30 ± 30.70     | 1.16 ± 1.52      |
| Gap fraction (%)                                | 42.70 ± 23.70 c  | 61.60 ± 25.00 ab  | 49.80 ± 21.10 bc  | 83.40 ± 26.40 a   | 85.30 ± 25.40 a   | 66.60 ± 15.50 ab  | 71.30 ± 23.80 ab  | 84.80 ± 17.10 a  |
| Weibull's shape parameter                       | 1.11 ± 0.68      | 1.07 ± 0.46       | 1.03 ± 0.43       | 1.09 ± 0.17       | 1.06 ± 0.22       | 1.05 ± 0.20       | 0.80 ± 0.45       | 0.98 ± 0.16      |
| Coarse woody debris volume (m <sup>3</sup> /ha) | 82.30 ± 69.10    | 92.00 ± 69.50     | 33.20 ± 22.70     | 27.60 ± 29.20     | 113.00 ± 101.00   | 51.00 ± 34.10     | 60.70 ± 48.50     | 41.90 ± 25.40    |
| Snag basal area (m <sup>2</sup> /ha)            | 5.80 ± 4.68      | 7.27 ± 6.00       | 3.57 ± 2.36       | 2.71 ± 1.17       | 5.17 ± 4.59       | 2.72 ± 1.52       | 4.42 ± 1.97       | 2.93 ± 1.54      |
| Maximum height (m)                              | 19.30 ± 3.88     | 20.00 ± 2.77      | 18.10 ± 3.37      | 17.10 ± 2.78      | 15.60 ± 6.78      | 18.10 ± 1.22      | 20.00 ± 1.98      | 16.80 ± 2.78     |
| Cohort basal area proportion                    | 0.37 ± 0.33      | 0.53 ± 0.37       | 0.48 ± 0.35       | 0.58 ± 0.35       | 0.34 ± 0.29       | 0.78 ± 0.25       | 0.45 ± 0.42       | 0.83 ± 0.34      |
| Minimum time since the last fire (years)        | 146.00 ± 45.60 c | 190.00 ± 65.40 bc | 179.00 ± 52.90 bc | 181.00 ± 53.00 bc | 159.00 ± 61.60 bc | 239.00 ± 49.70 a  | 209.00 ± 56.40 ab | 249.00 ± 71.60 a |
| Slope (%)                                       | 23.40 ± 10.80 a  | 13.20 ± 10.30 b   | 6.35 ± 8.03 c     | 4.33 ± 4.84 c     | 8.67 ± 7.51 bc    | 6.27 ± 6.33 bc    | 8.17 ± 6.21 bc    | 4.00 ± 3.37 c    |
| Depth of the organic horizon (cm)               | 16.00 ± 9.73 c   | 27.10 ± 11.80 b   | 35.10 ± 14.30 ab  | 27.70 ± 13.00 b   | 37.00 ± 25.00 ab  | 29.90 ± 15.40 b   | 37.20 ± 16.00 ab  | 47.90 ± 18.80 a  |

784 **Table 5** Mean  $\pm$  standard deviation of structural and environmental attributes for balsam fir  
 785 regeneration clusters (BF). Letters indicate significant differences at  $p < 0.05$ , following  $a > b > c$ .  
 786

| Cluster                                         | BF1                 | BF2                 | BF3                  | BF4                  |
|-------------------------------------------------|---------------------|---------------------|----------------------|----------------------|
| Tree density (n/ha)                             | 880.00 $\pm$ 332.00 | 927.00 $\pm$ 277.00 | 892.00 $\pm$ 104.00  | 810.00 $\pm$ 326.00  |
| Basal area (m <sup>2</sup> /ha)                 | 17.50 $\pm$ 7.27    | 20.80 $\pm$ 7.64    | 14.90 $\pm$ 1.92     | 21.70 $\pm$ 6.94     |
| Balsam fir proportion (%)                       | 4.12 $\pm$ 6.95 b   | 28.80 $\pm$ 19.10 a | 55.00 $\pm$ 5.10 a   | 56.70 $\pm$ 35.40 a  |
| Gap fraction (%)                                | 64.10 $\pm$ 26.00   | 57.10 $\pm$ 29.80   | 72.70 $\pm$ 14.80    | 64.00 $\pm$ 27.10    |
| Weibull's shape parameter                       | 0.87 $\pm$ 0.29     | 1.15 $\pm$ 0.62     | 0.88 $\pm$ 0.12      | 0.81 $\pm$ 0.13      |
| Coarse woody debris volume (m <sup>3</sup> /ha) | 61.60 $\pm$ 47.00 b | 84.00 $\pm$ 35.60 a | 155.00 $\pm$ 62.90 a | 121.00 $\pm$ 60.00 a |
| Snag basal area (m <sup>2</sup> /ha)            | 3.90 $\pm$ 3.05 c   | 5.09 $\pm$ 2.00 bc  | 14.00 $\pm$ 5.58 a   | 7.97 $\pm$ 4.40 ab   |
| Maximum height (m)                              | 18.90 $\pm$ 3.05    | 20.70 $\pm$ 2.06    | 19.70 $\pm$ 2.23     | 21.20 $\pm$ 1.75     |
| Cohort basal area proportion                    | 0.60 $\pm$ 0.35     | 0.63 $\pm$ 0.36     | 0.82 $\pm$ 0.30      | 0.74 $\pm$ 0.16      |
| Minimum time since the last fire (years)        | 213.00 $\pm$ 66.50  | 193.00 $\pm$ 50.60  | 188.00 $\pm$ 50.10   | 204.00 $\pm$ 41.40   |
| Slope (%)                                       | 8.14 $\pm$ 9.11 c   | 12.50 $\pm$ 10.5 bc | 18.70 $\pm$ 5.03 ab  | 28.40 $\pm$ 6.02 a   |
| Depth of the organic horizon (cm)               | 31.60 $\pm$ 16.00   | 26.10 $\pm$ 14.00   | 29.00 $\pm$ 15.10    | 21.60 $\pm$ 9.29     |

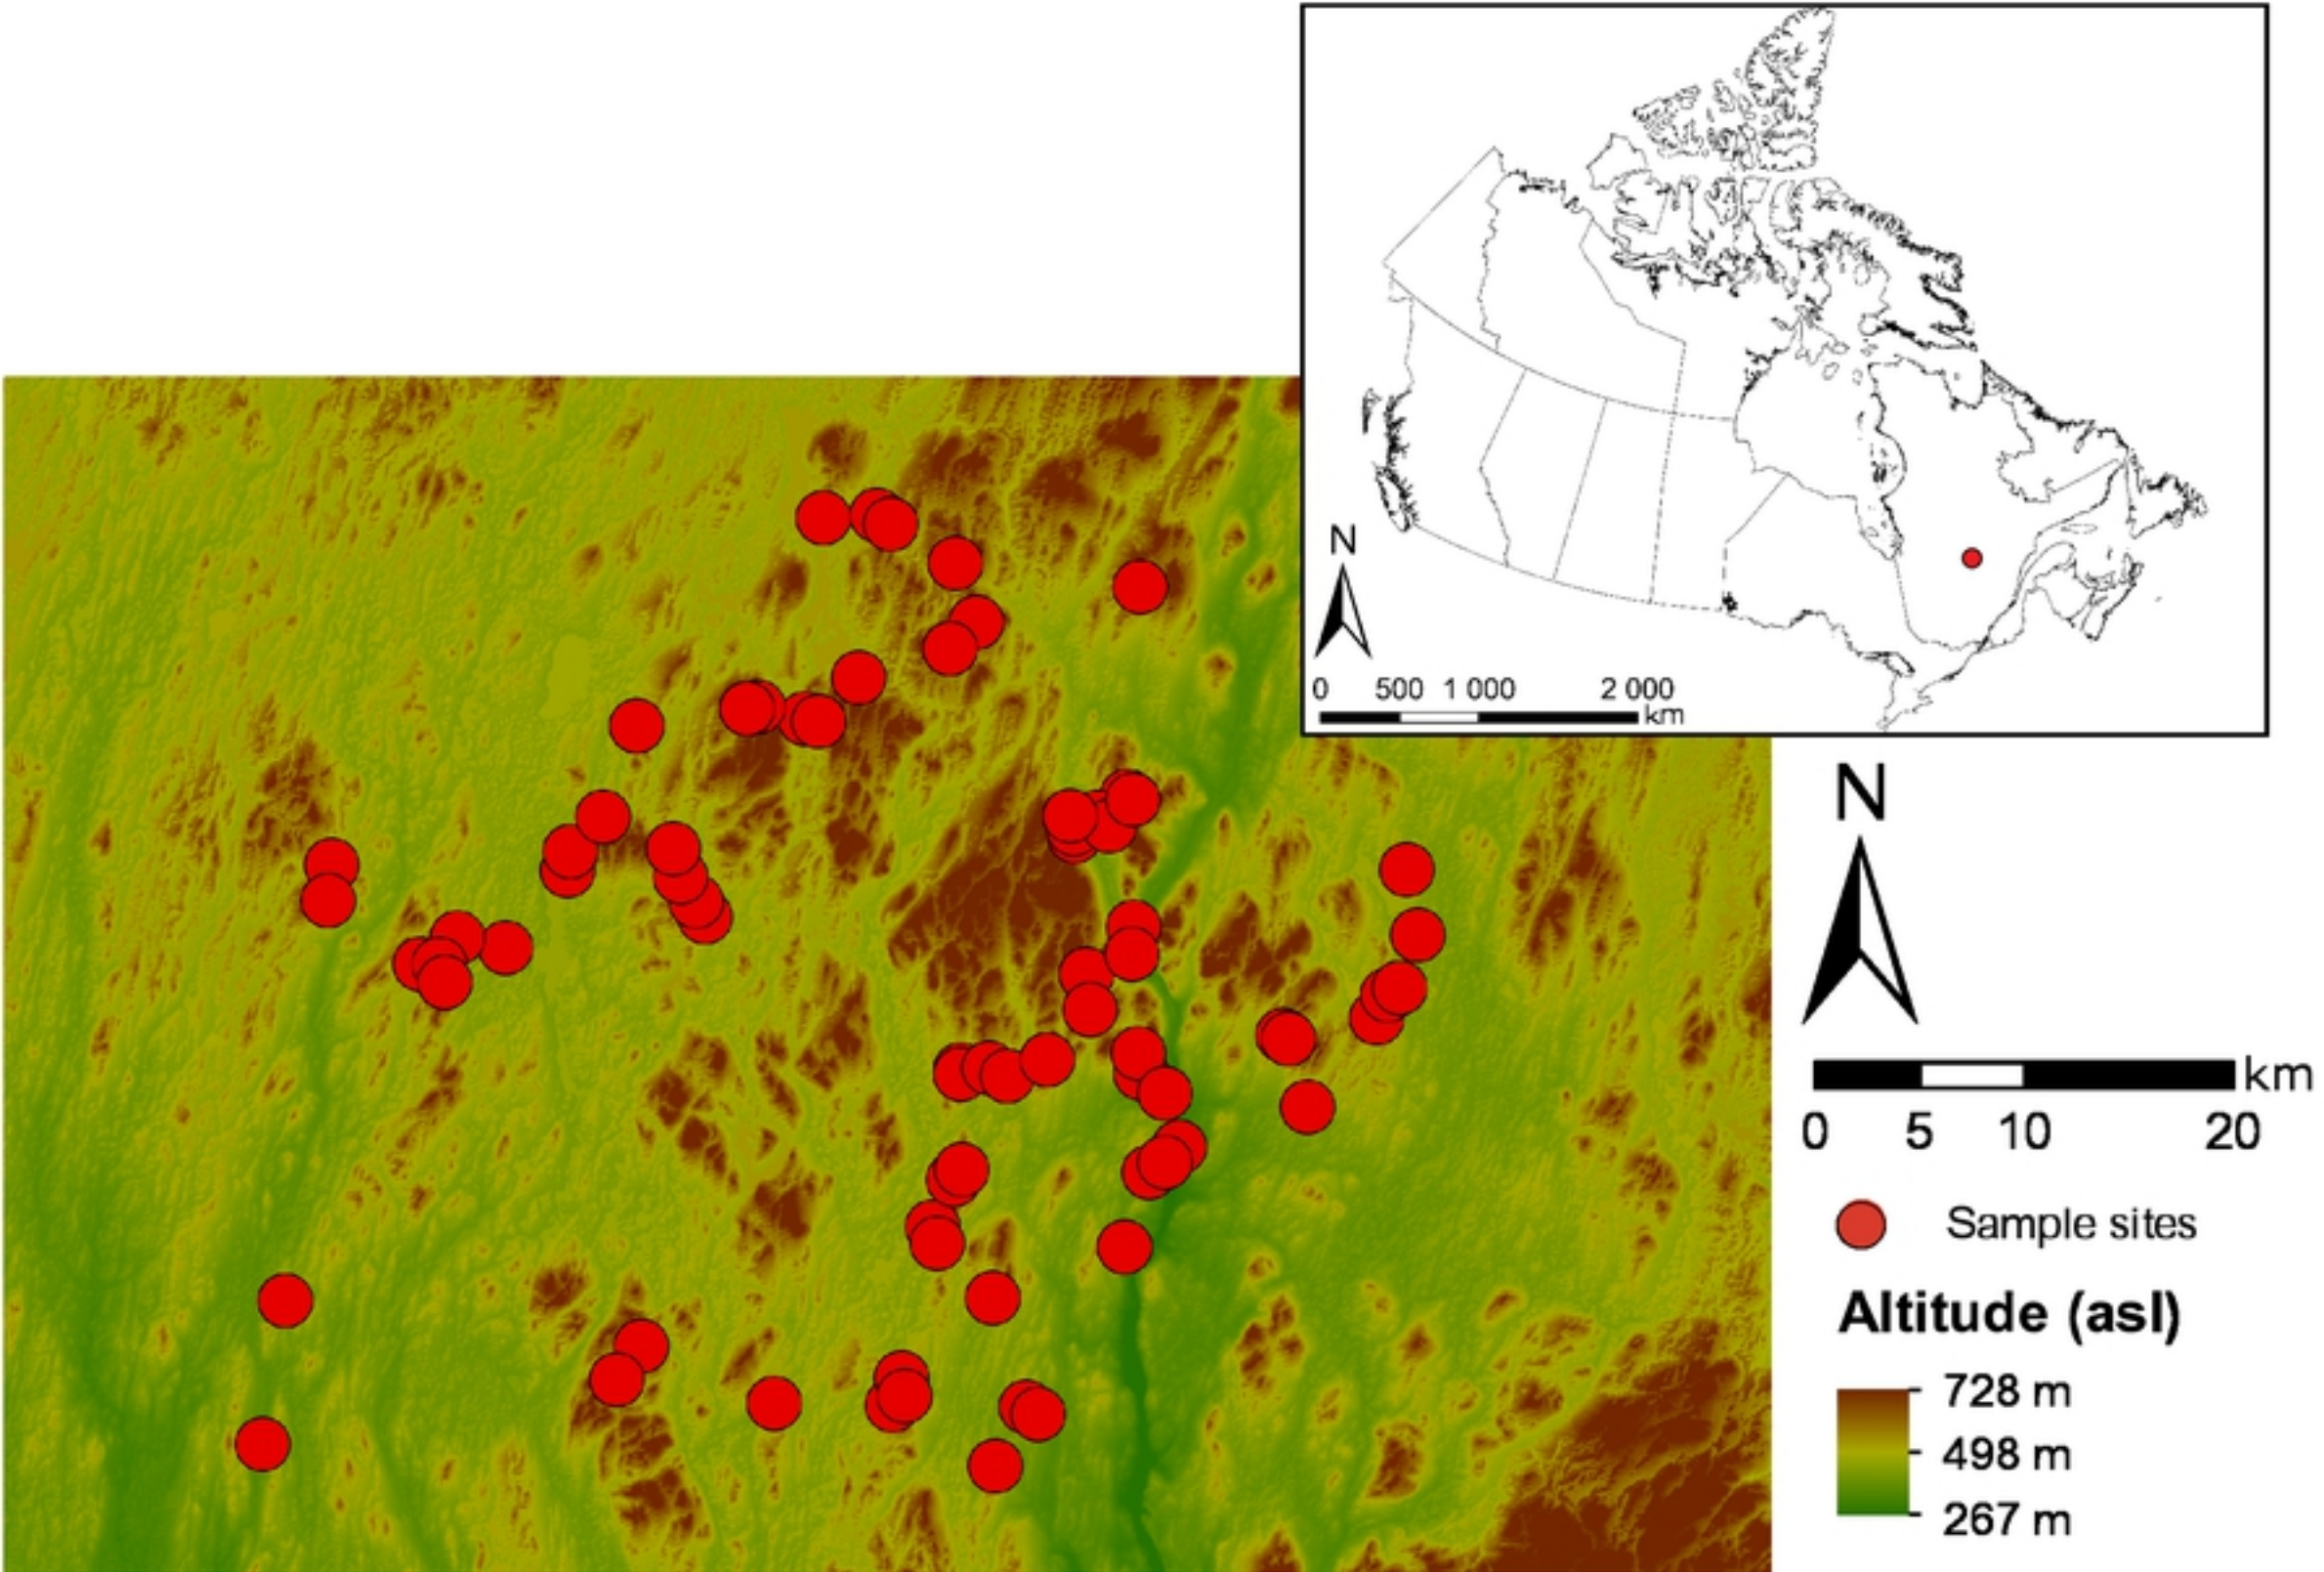

Figure 1

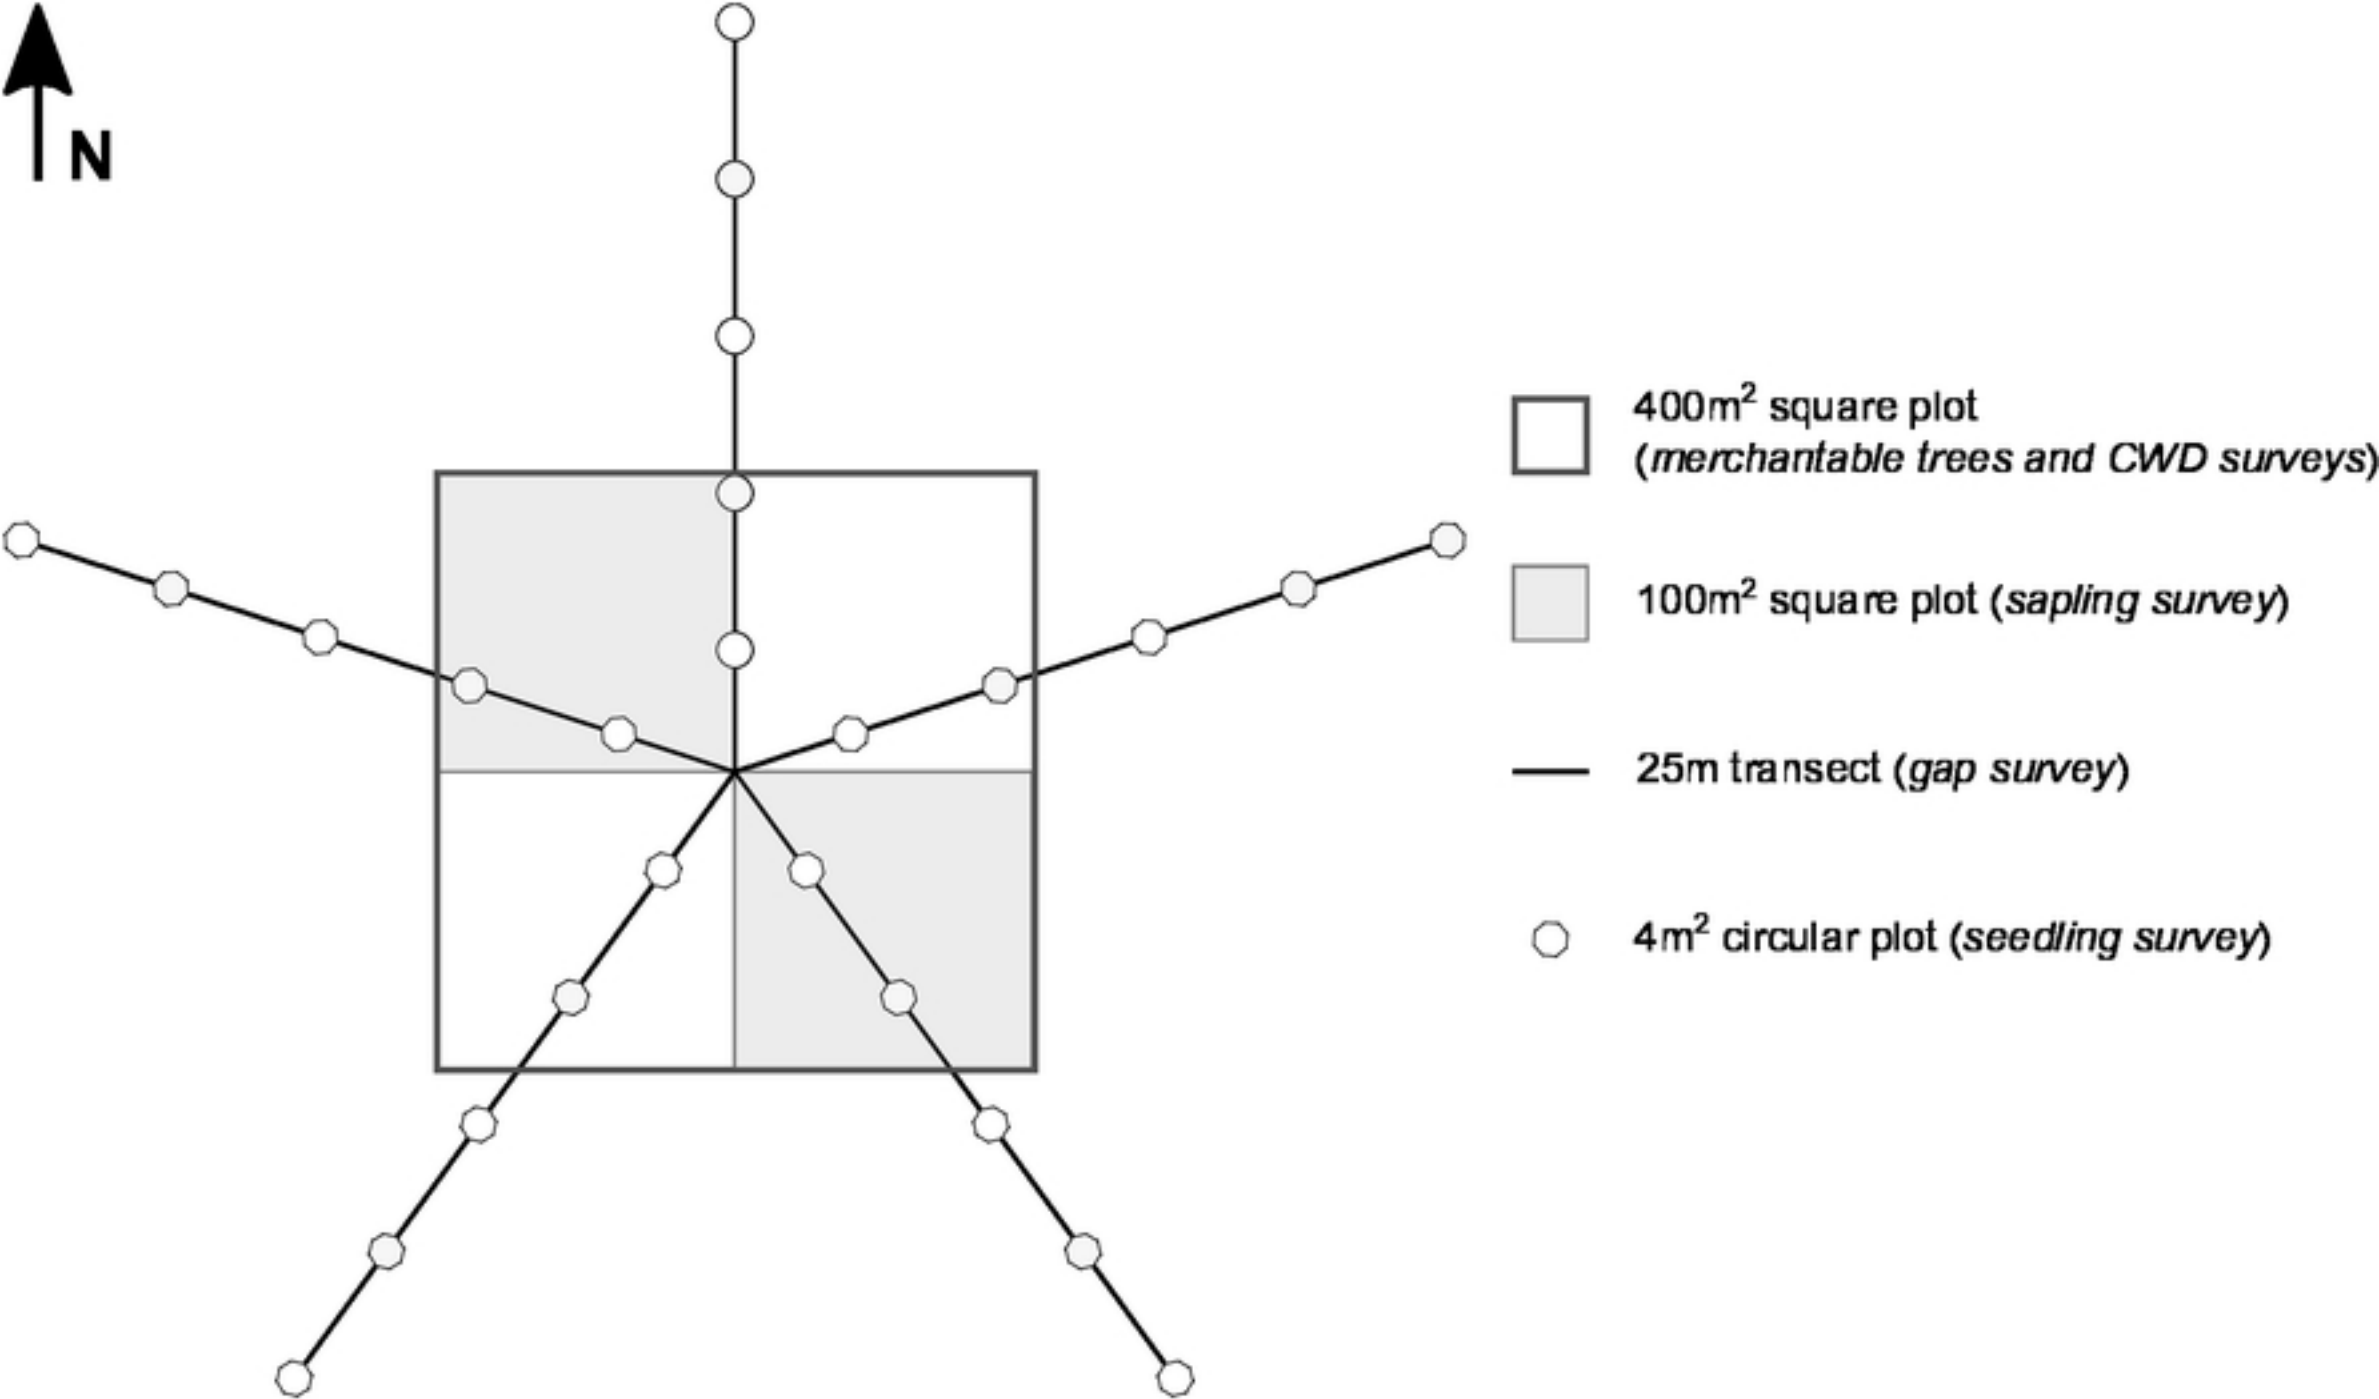

Figure 2

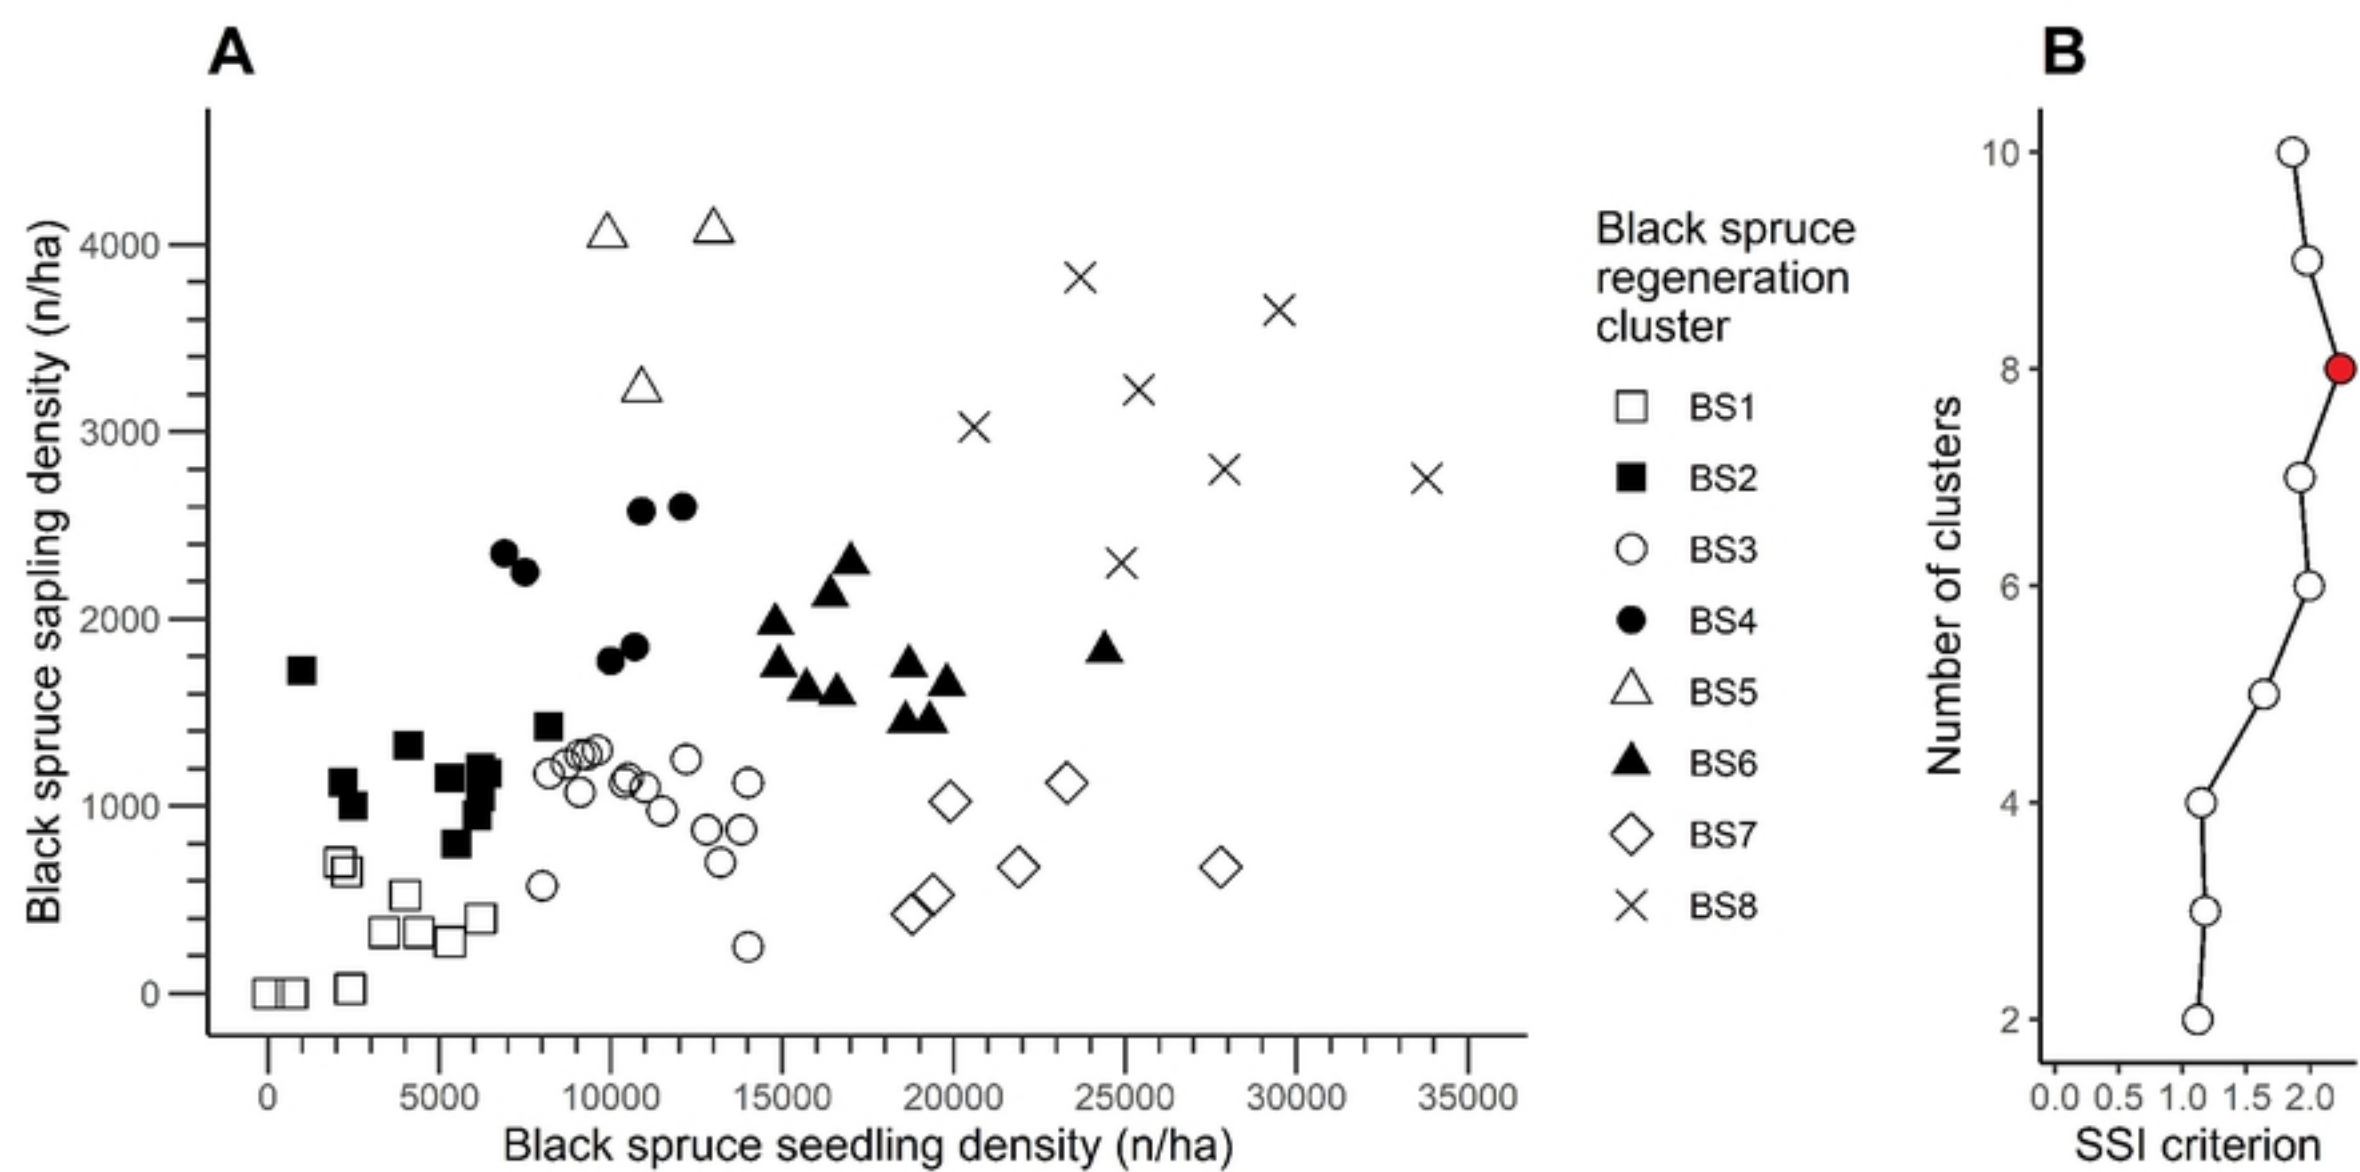

Figure 3

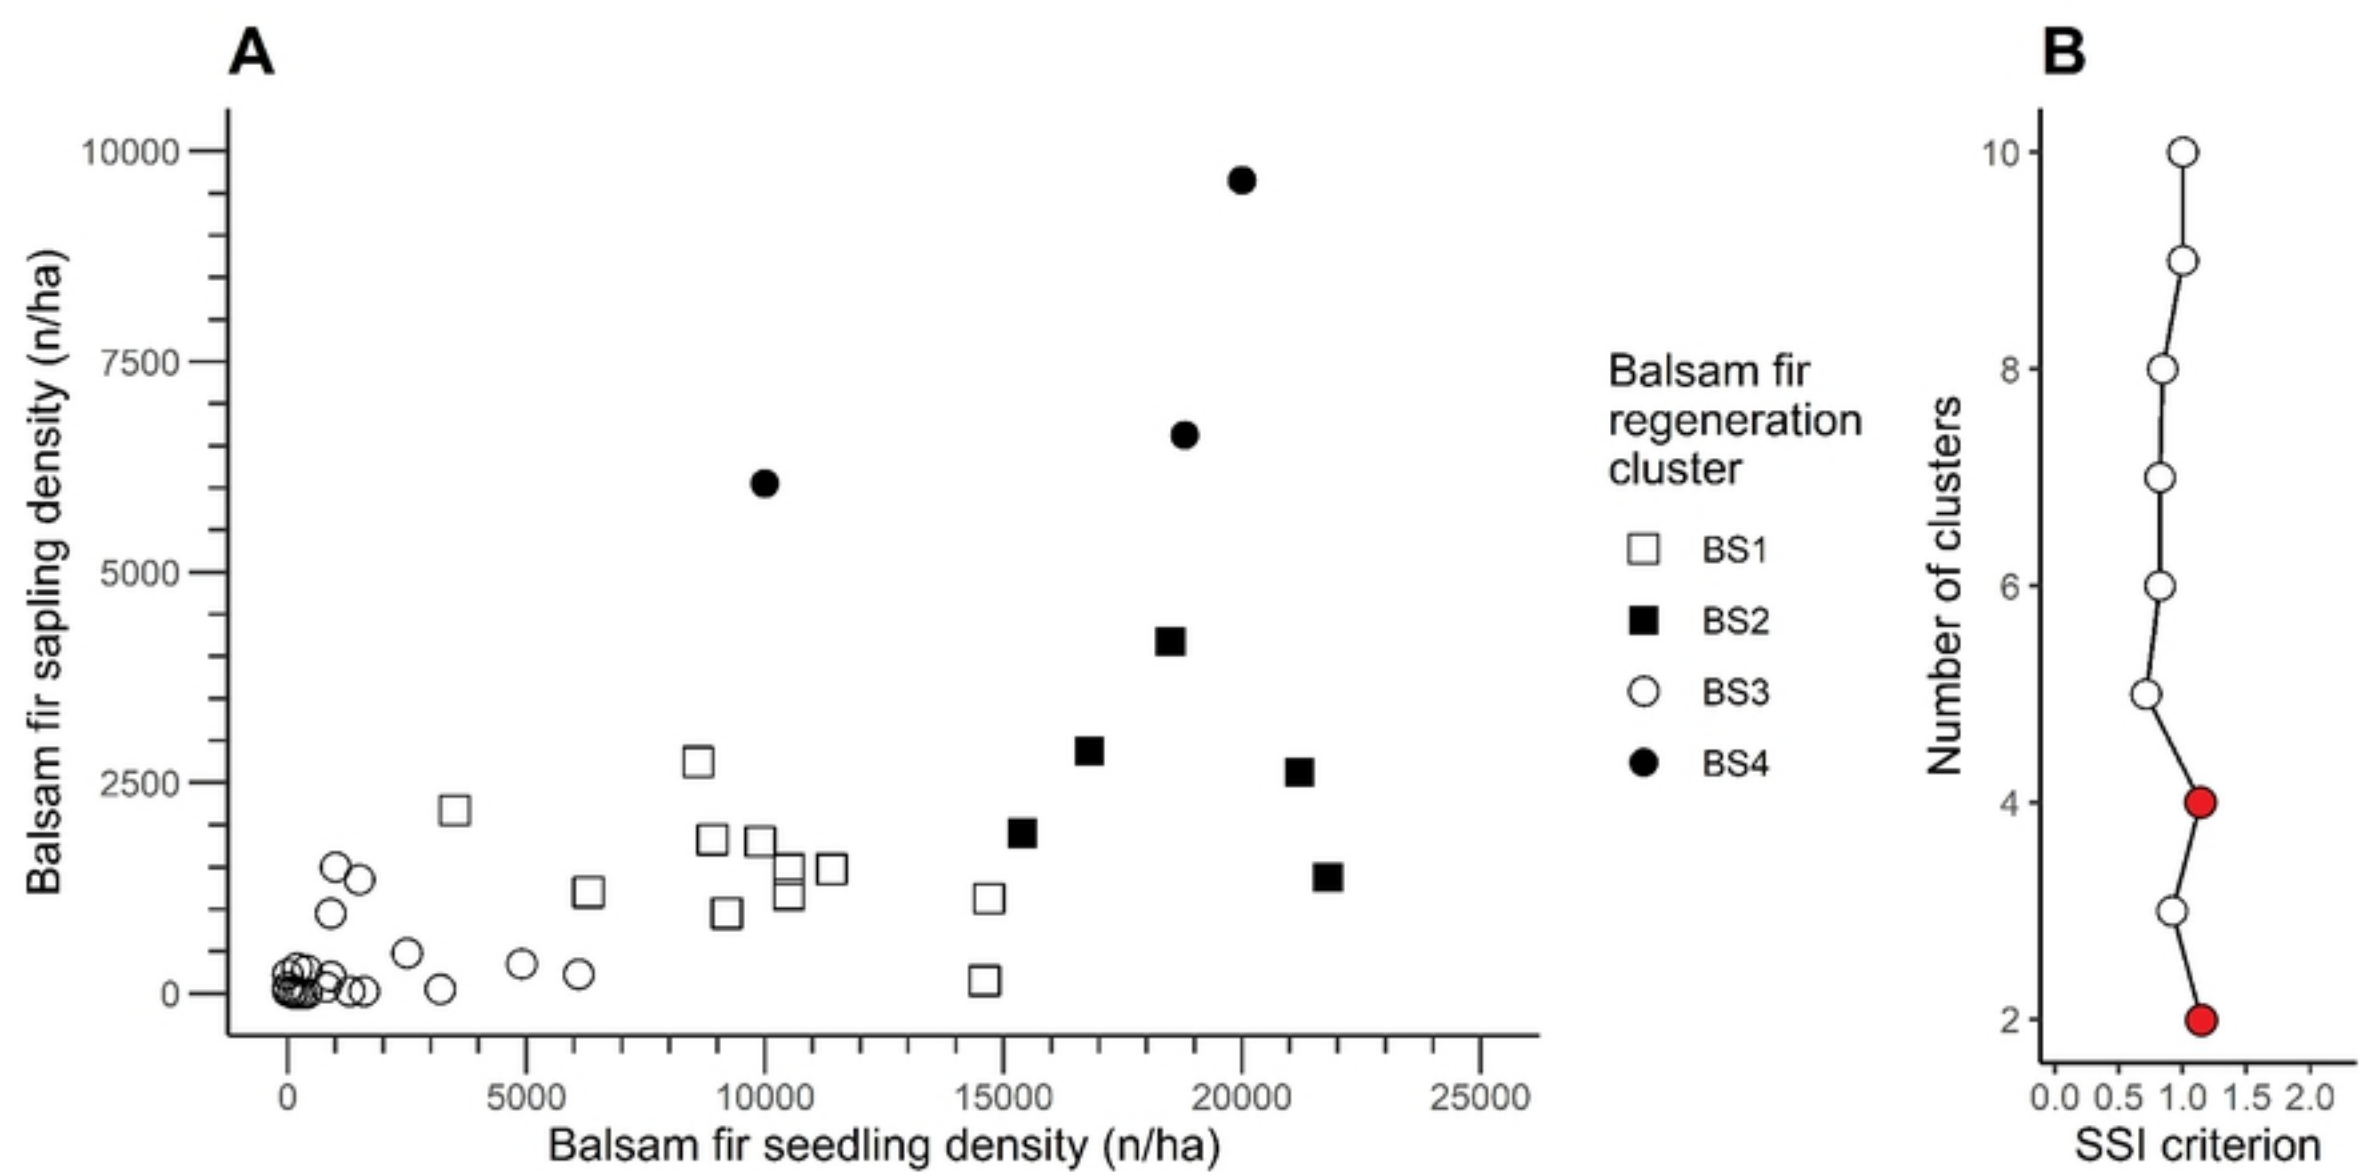

Figure 4

# A: Black spruce regeneration

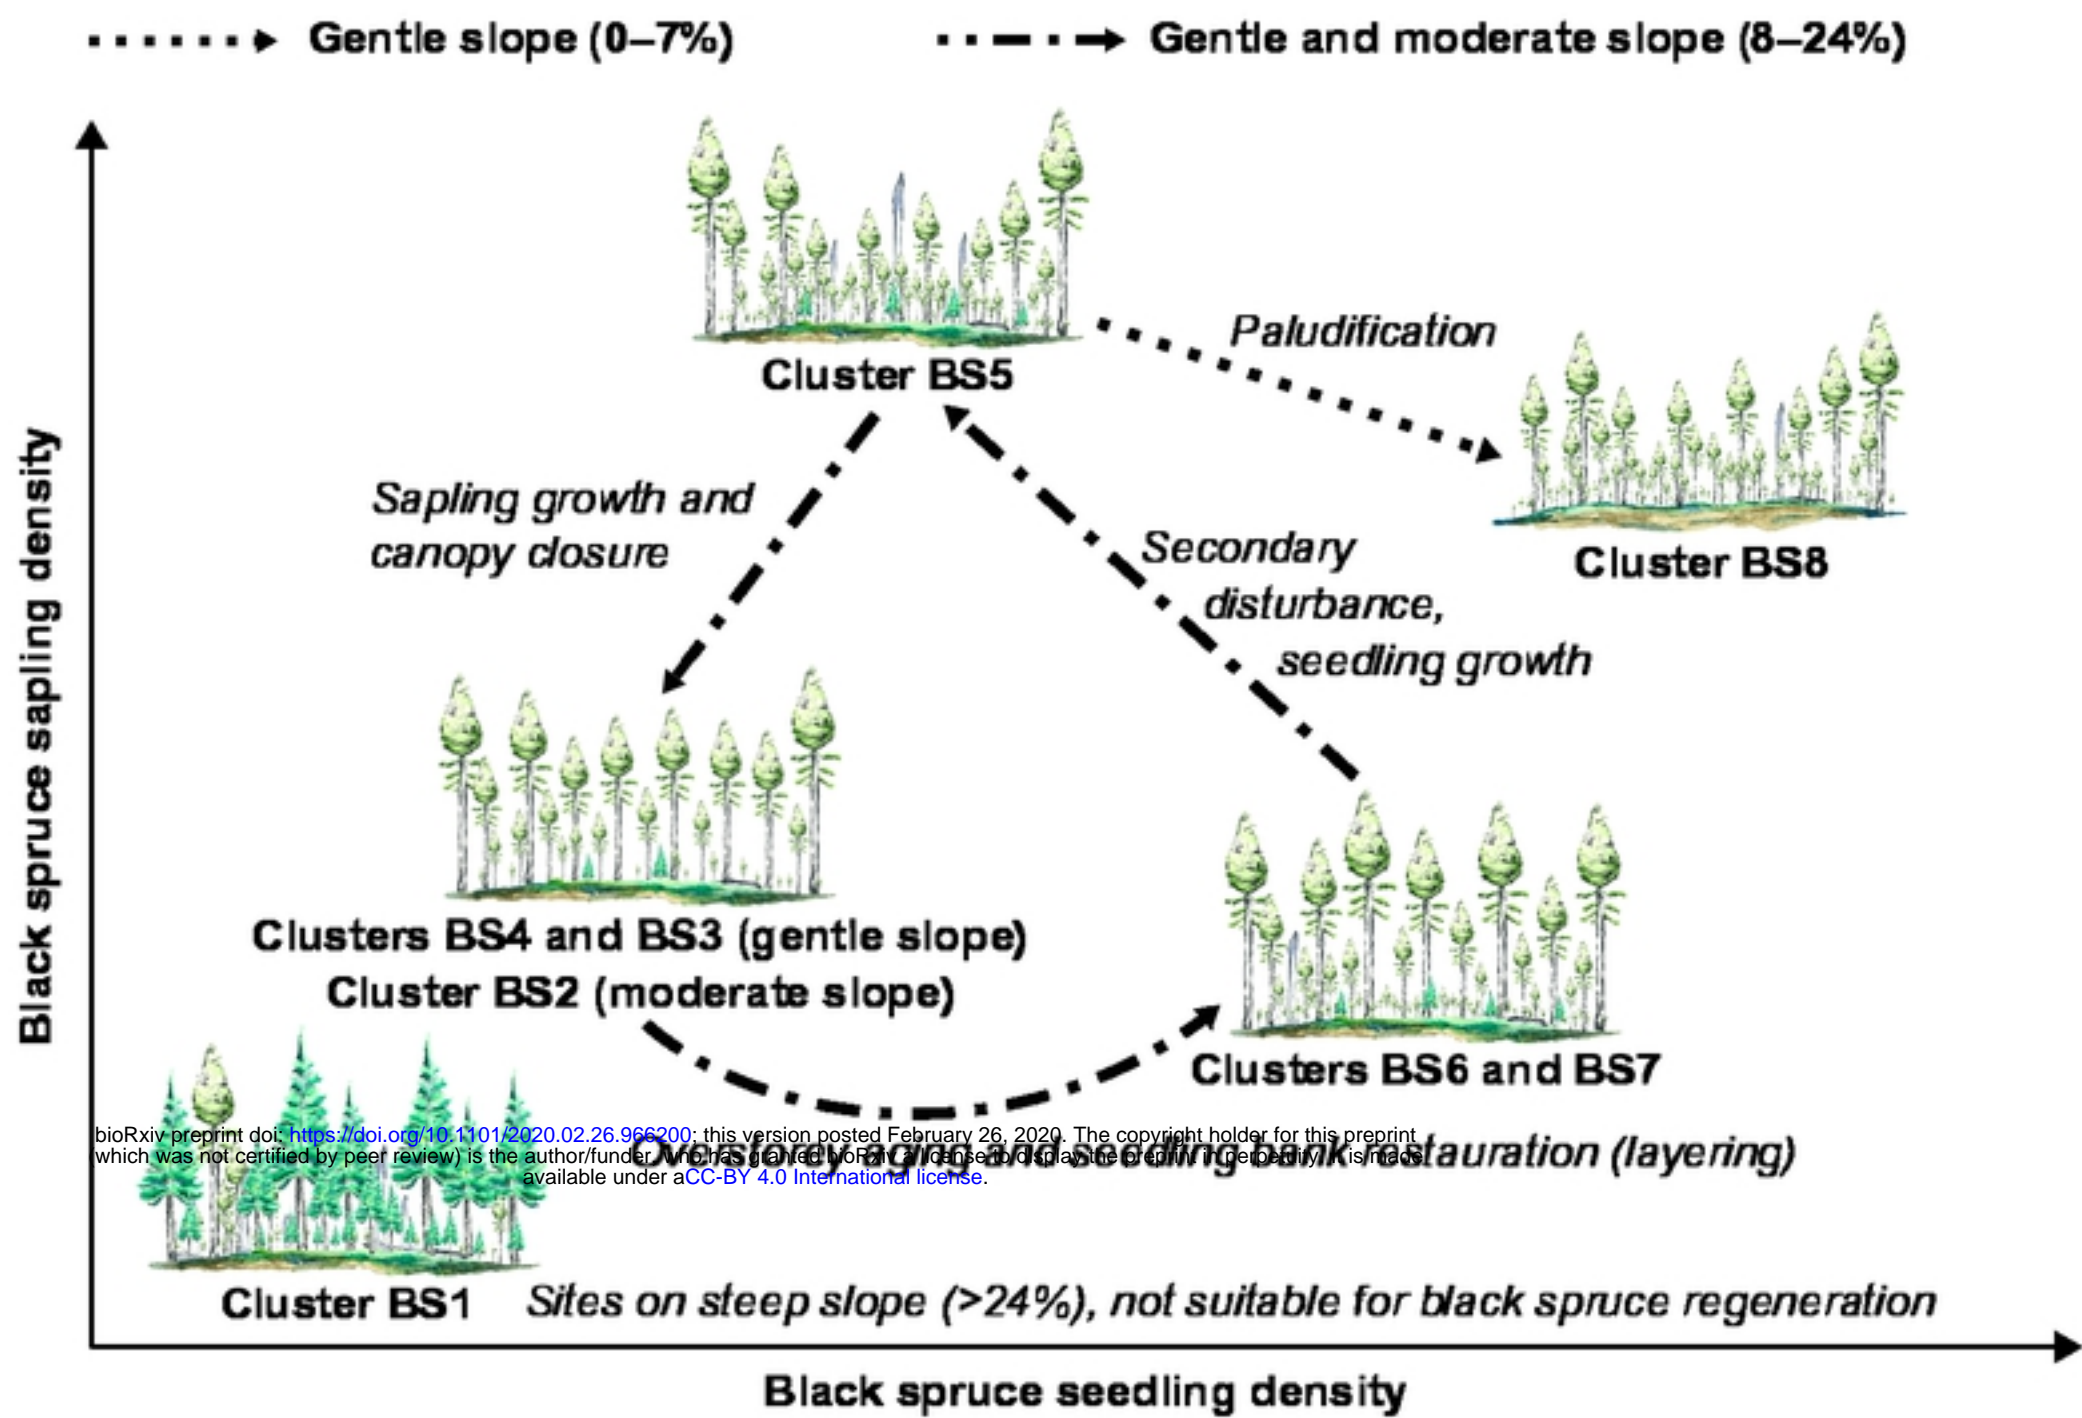

# B: Balsam fir regeneration

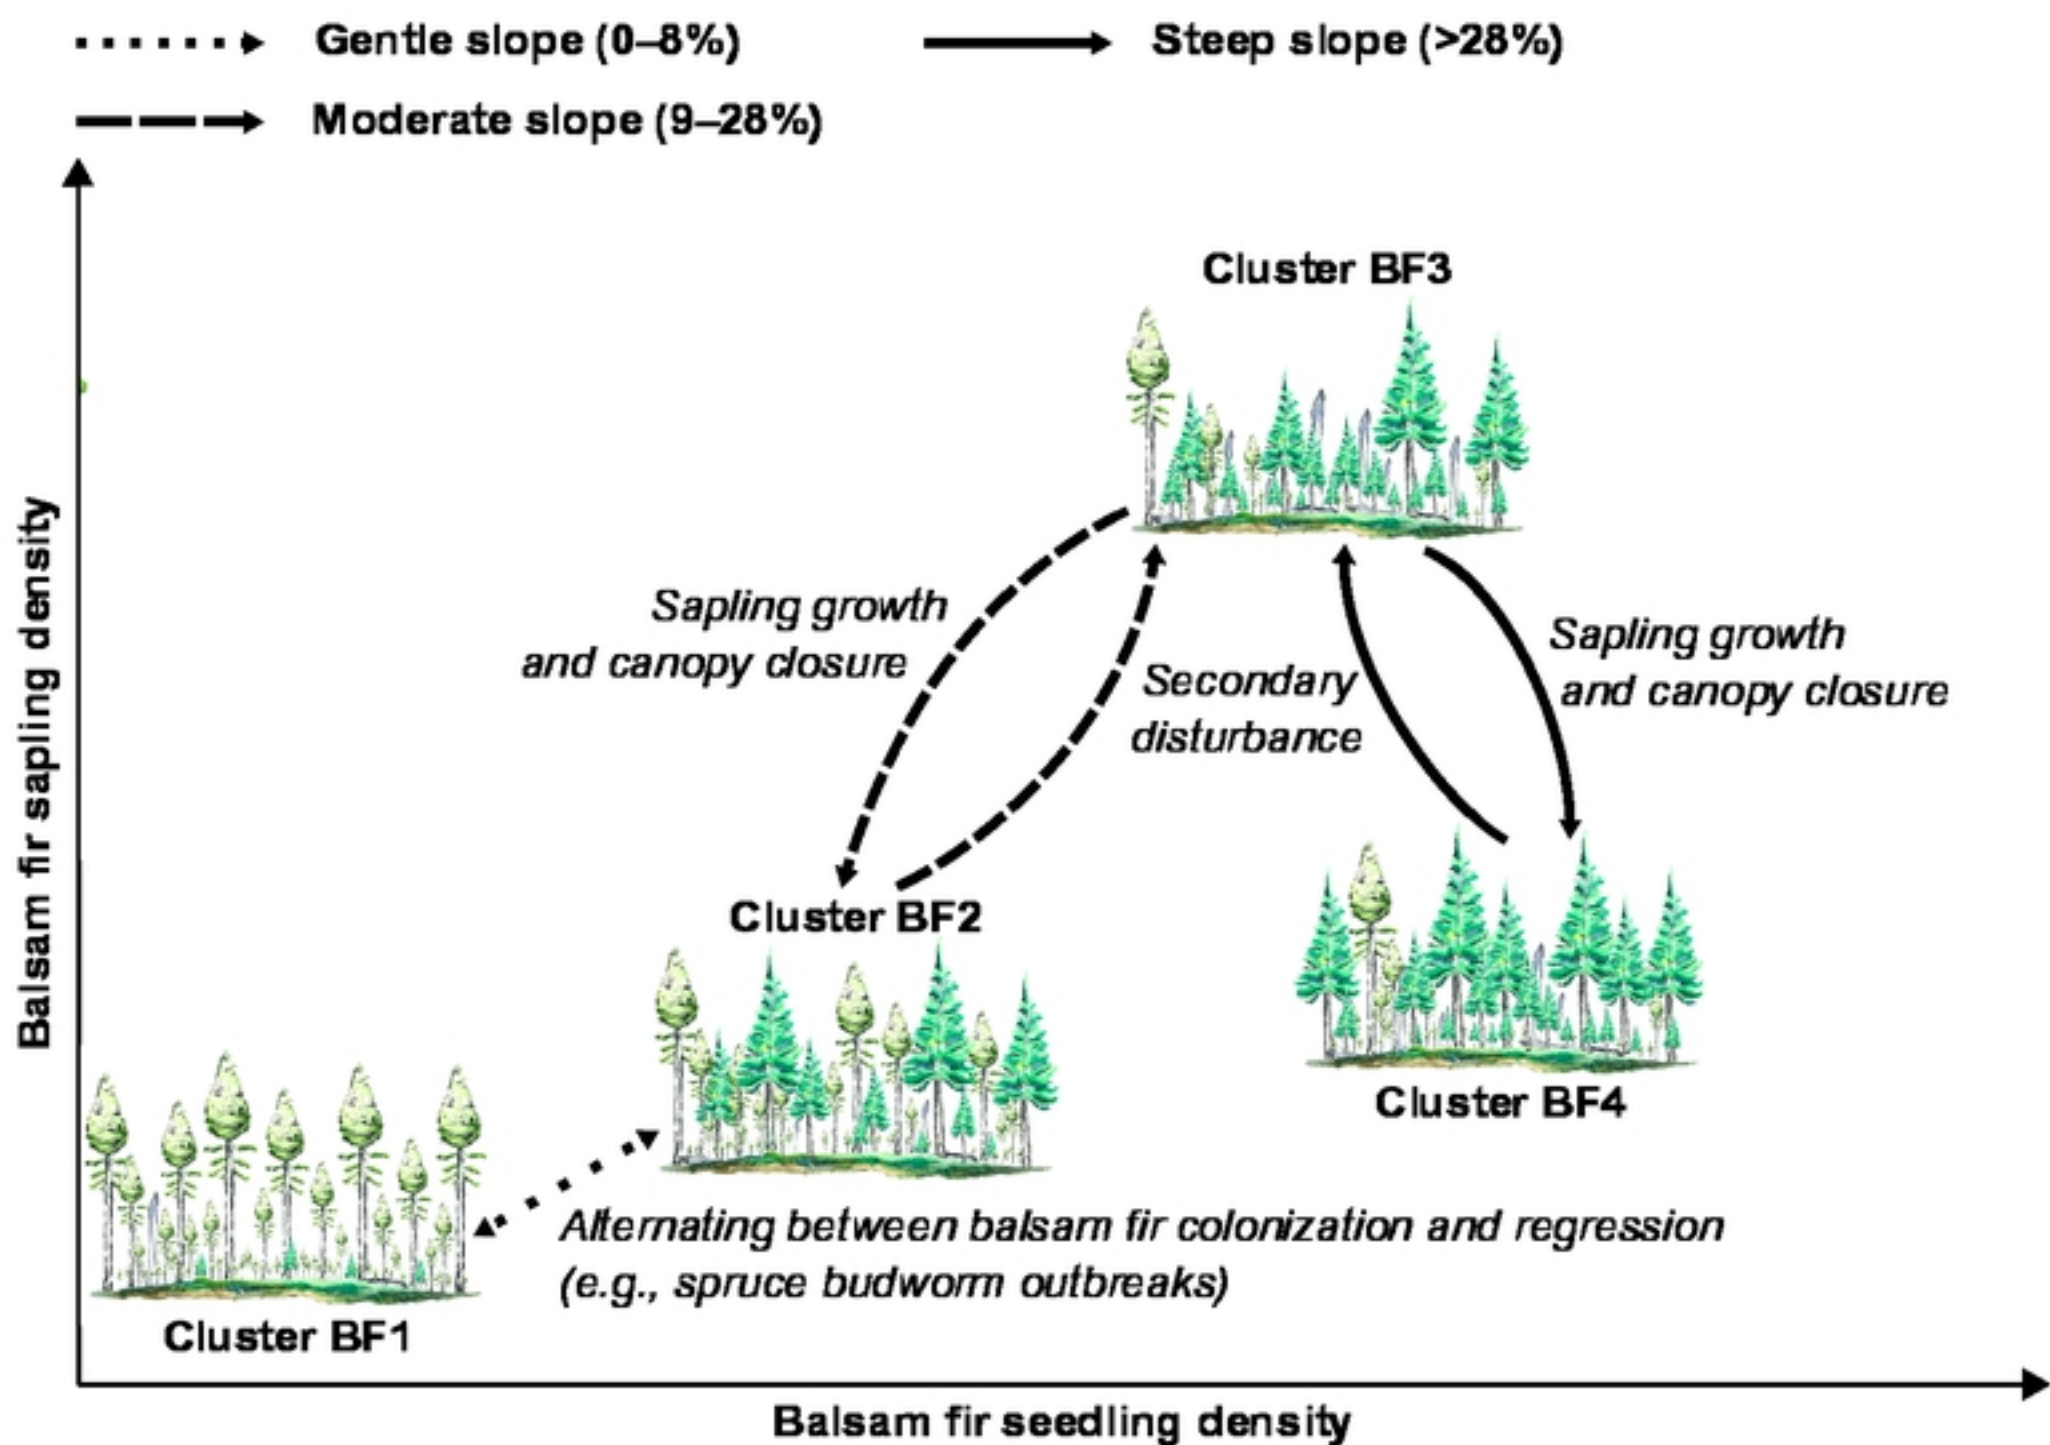

Figure 5
